# Supplementary material for: The progeroid gene BubR1 regulates axon myelination and motor function
Source: PubMed Central journal article supplement (PMC5191862; doi:10.18632/aging.101032), 2016-09-12
Supplement: aging-08-2667-s001.pdf [file aging-08-2667-s001.pdf]

SUPPLEMENTARY MATERIAL

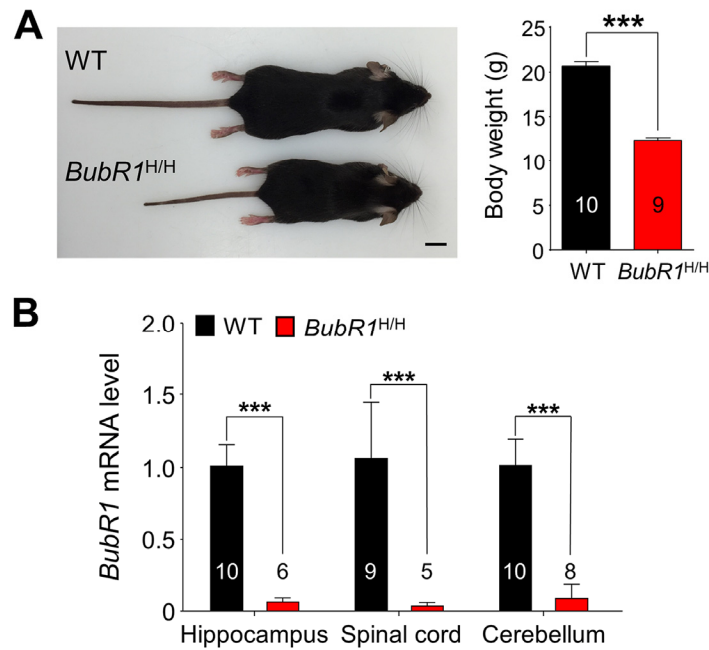

**Supplementary Figure 1. Body size and BubR1 expression level in 8 weeks old BubR1 insufficient mice.** (A) *BubR1<sup>H/H</sup>* mice are significantly smaller than WT mice. Left: Representative image of WT and *BubR1<sup>H/H</sup>* mice at 8 weeks of age. Right: Reduced body weight and length in *BubR1<sup>H/H</sup>* mice. Scale bar = 1 cm. (B) qRT-PCR experiments indicate reduced *BubR1* mRNA in isolated adult mouse hippocampi, spinal cord, and cerebellum. All values represent mean  $\pm$  SEM (\*\*\*)  $P < 0.001$ , student's t-test). Number associated with bar graphs indicates number of animals examined.

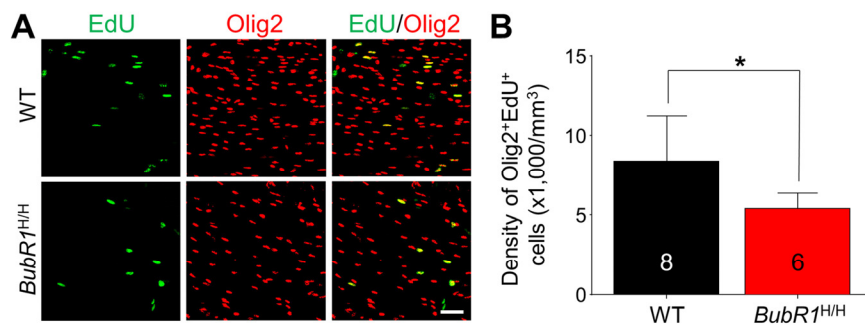

**Supplementary Figure 2. Reductions in proliferating OPCs in the corpus callosum of 1-week-old BubR1 insufficient mice.** (A) Representative images of EdU (green) and Olig2 (red) staining of 1 week-old WT and *BubR1<sup>H/H</sup>* mice corpus callosum. WT and *BubR1<sup>H/H</sup>* mice were injected with a single dose of EdU (41.2 mg/kg body weight, i.p.) and sacrificed after 2 hours. Scale bars: 100  $\mu$ m. (B) Quantification of EdU<sup>+</sup>Olig2<sup>+</sup> cell density in the corpus callosum. All values represent mean  $\pm$  SEM (\* $P < 0.05$ , student's t-test). Number associated with bar graphs indicates number of animals examined.

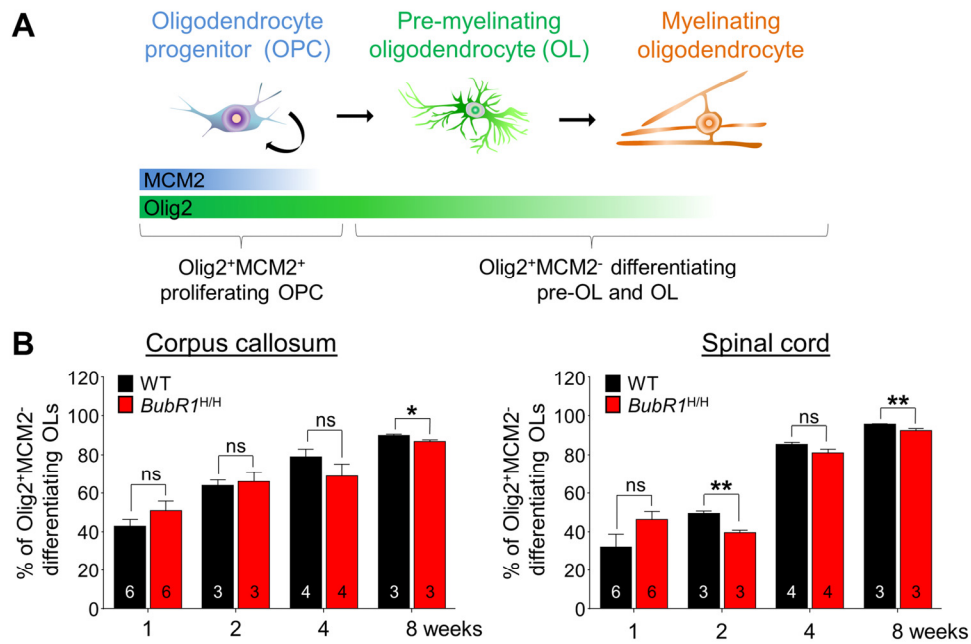

**Supplementary Figure 3. The proportion of proliferating OPCs among total Olig2<sup>+</sup> cells in BubR1 insufficient mice at different ages.** (A) Schematic representation of the proportion of proliferating oligodendrocyte progenitor cells (OPCs) vs. differentiating oligodendrocytes (OLs) among total Olig2<sup>+</sup> cells. (B) Quantification of differentiating pre-OLs and OLs (Olig2<sup>+</sup>MCM2<sup>-</sup>) in the corpus callosum (left) and white matter of spinal cord (right). All values represent mean ± SEM (ns: non-significant, \**P* < 0.05, \*\**P* < 0.01, student's t-test). Number associated with bar graphs indicates number of animals examined.

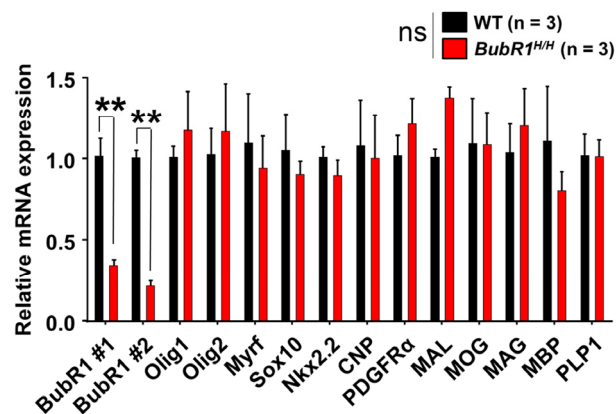

**Supplementary Figure 4. No changes in selected genes related to oligodendrocyte development and myelination in 1-week-old BubR1 insufficient mice.** Quantification of mRNA expression of oligodendrocyte development and myelination-related genes were significantly reduced in *BubR1<sup>H/H</sup>* mice at 1 week by qRT-PCR. All values represent mean ± SEM (ns: non-significant, \*\**p* < 0.01, student's t-test).

**Supplementary Table 1. Summary list of enriched genes in BubR1 insufficient mice by RNA-sequencing analysis.** Please browse the Full text version to see the data of Supplementary Table 1.

**Supplementary Table 2. Summary of significantly enriched genes in BubR1 insufficient mice by RNA-sequencing analysis.**

|               | Gene                          | <i>p</i> -value | F.C.(log <sub>2</sub> ) |
|---------------|-------------------------------|-----------------|-------------------------|
|               | Oligodendrocyte lineage cells | Mog             | 0.01582                 |
| Mal           |                               | 0.01367         | -2.22                   |
| Mag           |                               | 0.00024         | -2.14                   |
| Enpp6         |                               | 0.00091         | -2.13                   |
| Pdlim2        |                               | 0.02058         | -2.12                   |
| Plekhhl1      |                               | 0.00644         | -2.04                   |
| Opalin        |                               | 0.01285         | -1.99                   |
| Insc          |                               | 0.04700         | -1.91                   |
| Bcas1         |                               | 0.00032         | -1.86                   |
| Plxnb3        |                               | 0.02214         | -1.79                   |
| Cnp           |                               | 0.00059         | -1.78                   |
| Mobp          |                               | 0.00670         | -1.75                   |
| Aspa          |                               | 0.00071         | -1.69                   |
| Gpr17         |                               | 0.00048         | -1.68                   |
| Ninj2         |                               | 0.00780         | -1.65                   |
| Cldn11        |                               | 0.00296         | -1.65                   |
| Erbp3         |                               | 0.00709         | -1.62                   |
| Tmem88b       |                               | 0.00151         | -1.60                   |
| Lpar1         |                               | 0.00189         | -1.60                   |
| Bmp4          |                               | 0.00236         | -1.56                   |
| Mbp           |                               | 0.00098         | -1.55                   |
| Fa2h          |                               | 0.00118         | -1.55                   |
| Pllp          |                               | 0.01043         | -1.47                   |
| Tspan2        |                               | 0.00225         | -1.43                   |
| Plp1          |                               | 0.00255         | -1.41                   |
| Sox10         |                               | 0.00914         | -1.37                   |
| Tprn          |                               | 0.03378         | -1.35                   |
| Gamt          |                               | 0.00530         | -1.34                   |
| Gltp          |                               | 0.02723         | -1.33                   |
| Galnt6        |                               | 0.03866         | -1.30                   |
| Dock5         |                               | 0.00360         | -1.29                   |
| Gm98          |                               | 0.02498         | -1.27                   |
| Prr18         |                               | 0.02808         | -1.22                   |
| Cpm           |                               | 0.04832         | -1.20                   |
| Qdpr          |                               | 0.00424         | -1.20                   |
| Adamts4       |                               | 0.00337         | -1.18                   |
| Efhd1         | 0.02822                       | -1.10           |                         |
| Gsn           | 0.00434                       | -1.07           |                         |
| Arhgef10      | 0.00276                       | -1.02           |                         |
| 9630013A20Rik | 0.01037                       | -1.02           |                         |
|               |                               |                 |                         |
|               | Tmem141                       | 0.04560         | 1.04                    |
|               | Rbpjl                         | 0.03948         | 1.61                    |

  

|      | Gene    | <i>p</i> -value | F.C.(log <sub>2</sub> ) |       |
|------|---------|-----------------|-------------------------|-------|
|      | Neurons | Lhx5            | 0.02313                 | -1.27 |
| Bmp5 |         | 0.04600         | -1.17                   |       |
|      |         |                 |                         |       |
|      |         | C030023E24Rik   | 0.00924                 | 1.07  |
|      |         | Mia1            | 0.00903                 | 1.43  |
|      |         | Pla2g4e         | 0.01884                 | 1.83  |
|      |         | Pth2r           | 0.01704                 | 2.14  |

  

|        | Gene       | <i>p</i> -value | F.C.(log <sub>2</sub> ) |       |
|--------|------------|-----------------|-------------------------|-------|
|        | Astrocytes | Nmb             | 0.01456                 | -1.23 |
| Scara3 |            | 0.00411         | -1.13                   |       |
|        |            |                 |                         |       |
|        |            | Mamdc2          | 0.00772                 | 1.08  |
|        |            | Sp6             | 0.04233                 | 1.22  |
|        |            | Exd1            | 0.02362                 | 2.09  |

  

|  | Gene      | <i>p</i> -value | F.C.(log <sub>2</sub> ) |       |
|--|-----------|-----------------|-------------------------|-------|
|  | Microglia | Cd80            | 0.01424                 | -1.26 |
|  |           |                 |                         |       |
|  |           | Tgfb1           | 0.04308                 | 1.02  |
|  |           | H2-Eb1          | 0.00344                 | 1.05  |
|  |           | Cst7            | 0.03294                 | 1.08  |
|  |           | Nfam1           | 0.00884                 | 1.37  |
|  |           | Il4ra           | 0.04537                 | 1.43  |
|  |           | Clec4a1         | 0.04750                 | 1.49  |
|  |           | Card9           | 0.01122                 | 1.55  |

  

|  | Gene              | <i>p</i> -value | F.C.(log <sub>2</sub> ) |       |
|--|-------------------|-----------------|-------------------------|-------|
|  | Endothelial cells | Rasip1          | 0.03193                 | -1.62 |
|  |                   |                 |                         |       |
|  |                   | Clec14a         | 0.03186                 | 1.06  |
|  |                   | Ifi47           | 0.01498                 | 1.11  |
|  |                   | Hspa12b         | 0.04922                 | 1.11  |
|  |                   | Fam129a         | 0.02479                 | 1.57  |
|  |                   | Mmrn1           | 0.02199                 | 1.95  |
|  |                   | Aplnr           | 0.03804                 | 2.00  |
|  |                   | Fam124b         | 0.00127                 | 2.32  |

Expanded list of significantly enriched genes as visualized in Figure 2. Blue text indicates down-regulated genes and red indicates up-regulated genes. F.C.; fold change. N=3 mice per group.

**Supplementary Table 3. Summary of qRT-PCR primers used for validation.**

| <b>Target</b> | <b>Sequence</b>             | <b>Product (bp)</b> |
|---------------|-----------------------------|---------------------|
| mBubR1 #1-F   | ACCAGGCCCTCATCATAAAG        | 87                  |
| mBubR1 #1-R   | AAGAAGACCTGGAGAAGCCA        |                     |
| mBubR1 #2-F   | AGCTGAAAGAACGAAGGGAA        | 93                  |
| mBubR1 #2-R   | TCAGCCTCCTCTCCATCTCT        |                     |
| mOlig1-F      | CCACCACAACCTACCCACTG        | 65                  |
| mOlig1-R      | ACGGATACGAGAATAGCCCG        |                     |
| mOlig2-F      | CGCAGCGAGCACCTCAAATCTAA     | 81                  |
| mOlig2-R      | CCCAGGGATGATCTAAGCTCTCGAA   |                     |
| mMyrf-F       | TGGCAACTTCACCTACCACA        | 160                 |
| mMyrf-R       | GTGGAACCTCTGCAAAAAGC        |                     |
| mSox10-F      | AGCCCAGGTGAAGACAGAGA        | 146                 |
| mSox10-R      | AGTCAAACCTGGGGTCGTGAG       |                     |
| mNkx2.2-F     | CCTCCCCGAGTGGCAGAT          | 74                  |
| mNkx2.2-R     | GAGTTCTATCCTCTCCAAAAGTTCAAA |                     |
| mCnp-F        | GTTCTGAGACCCTCCGAAAA        | 108                 |
| mCnp-R        | CCTTGGGTTTCATCTCCAGAA       |                     |
| mMal-F        | TCACACTGGATGCAGCCTACC       | 71                  |
| mMal-R        | CAGGGCTTCCAGAACTGAGG        |                     |
| mMog-F        | ATGAAGGAGGCTACACCTGC        | 123                 |
| mMog-R        | CAAGTGCGATGAGAGTCAGC        |                     |
| mMag-F        | AACCAGTATGGCCAGAGAGC        | 133                 |
| mMag-R        | GTTCCGGGTTGGATTTTACC        |                     |
| mMbp-F        | CCCGTGGAGCCGTGATC           | 81                  |
| mMbp-R        | TCTTCAAACGAAAAGGGA          |                     |
| mPlp-F        | GTATAGGCAGTCTCTGCGCTGAT     | 201                 |
| mPlp-R        | AAGTGGCAGCAATCATGAAGG       |                     |
| mGapdh-F      | ACCAGAAGACTGTGGATGG         | 171                 |
| mGapdh-R      | CACATTGGGGGTAGGAACAC        |                     |
