# Supplementary material for: The progeroid gene BubR1 regulates axon myelination and motor function
Source: publisher site journal article supplement (doi:10.18632/aging.101032), 2016-09-12
Supplement: Supplementary file 1 [file aging-v8i11-101032-supplementary-material-SD2.docx]

**Supplementary Table 1. Summary list of enriched genes in BubR1 insufficient mice by RNA-sequencing analysis.**

|  | **Oligodendrocyte lineage cells enriched** | | | **Neuron enriched** | | | **Astrocyte enriched** | | | **Microglia enriched** | | | **Endothelial cells enriched** | | |
| --- | --- | --- | --- | --- | --- | --- | --- | --- | --- | --- | --- | --- | --- | --- | --- |
|  | | |  | | |  | | |  | | |  | | |
| **Gene** | ***p*-value** | **F.C.**  **(log2)** | **Gene** | ***p*-value** | **F.C.**  **(log2)** | **Gene** | ***p*-value** | **F.C.**  **(log2)** | **Gene** | ***p*-value** | **F.C.**  **(log2)** | **Gene** | ***p*-value** | **F.C.**  **(log2)** |
| 1 | Cldn11 | 0.00296 | -1.65 | Reln | 0.22148 | -0.25 | Hgf | 0.36429 | 0.53 | Gpr84 | N/A | N/A | AU021092 | 0.48088 | 2.25 |
| 2 | Mog | 0.01582 | -2.29 | Nhlh2 | 0.29613 | 0.56 | Gli1 | 0.42771 | 1.81 | Bcl2a1d | N/A | N/A | Eltd1 | 0.42942 | 0.32 |
| 3 | Plp1 | 0.00255 | -1.41 | Trp73 | 0.75714 | 0.26 | Aqp4 | 0.19792 | -0.13 | Bcl2a1a | N/A | N/A | Cldn5 | 0.10136 | -1.28 |
| 4 | Mobp | 0.00670 | -1.75 | Slc17a6 | 0.91225 | -0.06 | Gli2 | 0.42533 | -0.10 | Osm | N/A | N/A | Nostrin | 0.74403 | 0.22 |
| 5 | Fa2h | 0.00118 | -1.55 | Lhx5 | 0.02313 | -1.27 | Bmpr1b | 0.93755 | 0.02 | Slfn2 | 0.92183 | 0.07 | Slco1a4 | 0.25178 | 0.49 |
| 6 | Mbp | 0.00098 | -1.55 | Snhg11 | 0.43272 | 0.28 | Gli3 | 0.06720 | 0.38 | Ccl3 | 0.76042 | 0.30 | Icam2 | 0.68595 | -0.49 |
| 7 | Ugt8a | 0.01783 | -0.97 | Sst | 0.01601 | -0.36 | Lgr6 | 0.57034 | 0.43 | Tnf | N/A | N/A | Flt1 | 0.44065 | 0.27 |
| 8 | Ermn | 0.06444 | -1.50 | 5330417C22Rik | 0.92845 | 0.02 | Plcd4 | 0.54690 | 0.17 | Ncf1 | 0.85032 | -0.04 | Slc38a5 | 0.42291 | 0.35 |
| 9 | Gjb1 | 0.31001 | -0.76 | 1500016L03Rik | N/A | N/A | Ppp1r3c | 0.34168 | 0.20 | Ccl4 | N/A | N/A | Tek | 0.45212 | -0.16 |
| 10 | Enpp6 | 0.00091 | -2.13 | Dlx1 | 0.27493 | 0.28 | Tnc | 0.59407 | 0.21 | Lrrc25 | N/A | N/A | Myct1 | 0.65856 | 0.70 |
| 11 | Opalin | 0.01285 | -1.99 | Dlx6os1 | N/A | N/A | Ccrl1 | 0.56261 | 1.27 | Bcl2a1b | 0.22505 | -0.23 | Apold1 | 0.33865 | 0.68 |
| 12 | Tmem125 | 0.66031 | -0.15 | Mrap2 | 0.74720 | 0.15 | Pla2g3 | 0.98150 | -0.01 | P2ry6 | 0.16947 | 0.62 | E030010A14Rik | 0.45323 | 0.43 |
| 13 | Tmem88b | 0.00151 | -1.60 | Nxph4 | 0.46524 | -0.98 | Slc30a10 | 0.06943 | 0.26 | Gdf15 | N/A | N/A | Emcn | 0.25481 | 0.36 |
| 14 | Gjc2 | 0.11006 | -1.55 | Sp9 | 0.13282 | 1.19 | Ptx3 | 0.53098 | 0.28 | Gna15 | 0.22397 | 1.17 | Abcb1a | 0.18079 | 0.27 |
| 15 | 9630013A20Rik | 0.01037 | -1.02 | Gdf5 | N/A | N/A | A2m | 0.11139 | 1.08 | Tmem119 | 0.27238 | -0.28 | Ctla2a | 0.82106 | 0.13 |
| 16 | Gm98 | 0.02498 | -1.27 | Mab21l1 | 0.82196 | -0.10 | Itih3 | 0.74960 | -0.21 | Ccl9 | 0.79777 | 0.10 | Aplnr | 0.03804 | 2.00 |
| 17 | Mag | 0.00024 | -2.14 | Igfbpl1 | 0.94698 | -0.05 | Gcnt4 | 0.48119 | -0.46 | Cd83 | 0.68239 | -0.31 | Prnd | 0.09187 | 1.88 |
| 18 | Gjc3 | 0.06028 | -0.67 | Ecel1 | 0.24989 | -1.80 | Mamdc2 | 0.00772 | 1.08 | Bcl2a1c | N/A | N/A | Esam | 0.68442 | -0.15 |
| 19 | Neu4 | 0.10158 | -1.23 | Npy | 0.34768 | -0.62 | Slc14a1 | 0.65152 | 0.11 | Tlr2 | 0.87623 | 0.13 | Cd93 | 0.18643 | 0.45 |
| 20 | Gpr17 | 0.00048 | -1.68 | Nos1 | 0.36312 | -0.31 | Atp13a4 | 0.14859 | 0.29 | C1qa | 0.64764 | -0.34 | Car4 | 0.54232 | -0.19 |
| 21 | Nkx6-2 | 0.31965 | -1.17 | Islr2 | 0.71059 | -0.11 | Slc14a2 | 0.27780 | 0.79 | Ccr7 | N/A | N/A | Tie1 | 0.38777 | -0.65 |
| 22 | Gsn | 0.00434 | -1.07 | Crabp1 | 0.51990 | -0.05 | Grm3 | 0.67865 | -0.07 | Ptafr | 0.37922 | -1.41 | Akr1c14 | 0.45355 | -0.25 |
| 23 | S1pr5 | 0.05570 | -1.06 | Ebf3 | 0.45676 | 0.81 | P4ha3 | 0.54384 | -0.16 | Slc15a3 | 0.38440 | -0.68 | Gpr116 | 0.62058 | 0.16 |
| 24 | Bcas1 | 0.00032 | -1.86 | Celf6 | 0.41286 | 0.25 | Paqr6 | 0.85543 | 0.18 | Selplg | 0.68970 | -0.19 | Kdr | 0.02753 | 0.91 |
| 25 | Erbb3 | 0.00709 | -1.62 | Tmem90a | 0.79193 | 0.11 | Fgfr3 | 0.54232 | -0.13 | Cd300a | 0.35085 | 0.21 | Slc16a4 | 0.42043 | 0.41 |
| 26 | 1700047M11Rik | 0.11389 | -2.50 | Kcnk9 | 0.59312 | -0.17 | Egfr | 0.16791 | -0.25 | C5ar1 | N/A | N/A | Ly6c1 | 0.56879 | 0.35 |
| 27 | Mal | 0.01367 | -2.22 | Dlx1as | 0.43068 | 0.13 | Gdpd2 | 0.52970 | -0.26 | Gpr183 | 0.96877 | 0.02 | Cdh5 | 0.07102 | 0.42 |
| 28 | Cldn14 | N/A | N/A | Dlx5 | 0.75890 | 0.10 | Nwd1 | 0.97123 | 0.01 | Sfpi1 | 0.15572 | -0.69 | Rassf9 | 0.48660 | 0.50 |
| 29 | Hapln2 | 0.26125 | -0.52 | Ripk4 | 0.50063 | -0.47 | Slc4a4 | 0.11401 | 0.13 | Irf8 | 0.50541 | 0.47 | Ocln | 0.38452 | 0.34 |
| 30 | Gal3st1 | 0.68185 | -0.27 | Magel2 | 0.34603 | 0.33 | Itga7 | 0.10703 | 0.27 | Pld4 | 0.05365 | 1.17 | Erg | 0.13853 | 0.62 |
| 31 | Nipal4 | 0.18397 | -0.80 | Slc10a4 | 0.52280 | 1.93 | Aqp9 | 0.94482 | 0.68 | Cd14 | 0.50140 | -0.23 | Lsr | 0.93293 | -0.04 |
| 32 | Plekhb1 | 0.00125 | -1.00 | Pnoc | 0.49902 | 0.23 | Aldh1l1 | 0.70350 | -0.06 | Hck | 0.78426 | 0.26 | Mmrn2 | 0.36913 | 0.51 |
| 33 | Sox10 | 0.00914 | -1.37 | Grem2 | 0.50065 | 0.17 | St6galnac5 | 0.93844 | 0.01 | Ccl12 | N/A | N/A | Ly75 | 0.47040 | 0.43 |
| 34 | Ninj2 | 0.00780 | -1.65 | Sp8 | 0.24467 | 1.32 | Cbs | 0.80271 | -0.07 | Sash3 | 0.53543 | 0.63 | Pglyrp1 | 0.48151 | -0.56 |
| 35 | Plxnb3 | 0.02214 | -1.79 | Scube3 | 0.05288 | 0.92 | Cybrd1 | 0.02227 | 0.60 | Niacr1 | N/A | N/A | Madcam1 | N/A | N/A |
| 36 | Matn4 | N/A | N/A | Kcnj5 | 0.99081 | 0.01 | Fmo1 | 0.05750 | -0.73 | C1qc | 0.91767 | -0.05 | Tm4sf1 | 0.71178 | 0.18 |
| 37 | Lgi3 | 0.02069 | -0.58 | Clstn2 | 0.93721 | -0.02 | Phkg1 | 0.23426 | -0.19 | Tlr9 | 0.19143 | 0.96 | Scgb3a1 | N/A | N/A |
| 38 | Cnp | 0.00059 | -1.78 | Lhx1 | 0.77209 | -0.44 | Slc6a11 | 0.32011 | 0.31 | Slamf8 | 0.94112 | -0.02 | Fgfbp1 | 0.53424 | -1.00 |
| 39 | Susd5 | 0.08824 | -0.83 | Hcn4 | 0.76147 | -0.14 | Otx1 | 0.50816 | 0.25 | C1qb | 0.38396 | -0.28 | Pcdh12 | N/A | N/A |
| 40 | Fam70b | 0.27384 | 0.68 | Npas4 | 0.99787 | 0.00 | Gm973 | 0.67459 | 0.20 | Lrch4 | 0.60052 | 0.14 | Cyyr1 | 0.02483 | 0.93 |
| 41 | Insc | 0.04700 | -1.91 | 42433 | N/A | N/A | Ttll8 | 0.39628 | 0.57 | Ncf4 | N/A | N/A | Ushbp1 | 0.18639 | 1.54 |
| 42 | Sema3d | 0.97593 | -0.01 | Grm2 | 0.61589 | -0.16 | Cth | 0.34020 | -0.63 | Trem2 | 0.73606 | -0.25 | Slc22a8 | 0.72320 | -0.13 |
| 43 | Pdgfra | 0.12097 | -0.44 | Nell1 | 0.56689 | 0.15 | Chrdl1 | 0.35536 | -0.30 | Abcc3 | 0.95017 | 0.02 | Asb4 | 0.59360 | -0.79 |
| 44 | Ppp1r14a | N/A | N/A | Tmem130 | 0.96228 | -0.01 | Ccdc80 | 0.65617 | -0.29 | H2-Ea-ps | N/A | N/A | Sox17 | 0.75927 | 0.16 |
| 45 | Tnr | 0.17804 | -0.27 | Glra2 | 0.71732 | -0.17 | Slc25a34 | 0.43546 | 0.65 | Tifab | 0.27968 | 0.35 | Foxq1 | 0.58157 | -0.41 |
| 46 | Il23a | N/A | N/A | Pcsk1 | 0.66910 | -0.14 | Sorcs2 | 0.13359 | -0.33 | Cd37 | 0.19398 | -0.64 | Wfdc1 | 0.57843 | 0.68 |
| 47 | Itgb4 | 0.15160 | -1.32 | Slc32a1 | 0.32218 | 0.16 | Cyp4f15 | 0.46367 | 0.37 | H2-Oa | N/A | N/A | Robo4 | 0.31813 | 1.25 |
| 48 | Klk6 | N/A | N/A | Cacna2d2 | 0.71638 | 0.16 | Entpd2 | 0.40991 | -0.54 | 1810011H11Rik | 0.32293 | 1.43 | Nos3 | 0.38079 | 0.61 |
| 49 | Zfp488 | 0.69508 | 0.17 | St8sia2 | 0.77158 | -0.12 | Grhl1 | 0.16013 | 0.22 | Tbxas1 | 0.06437 | -1.35 | Ly6c2 | 0.51621 | 0.12 |
| 50 | Dct | 0.36235 | -0.18 | Tbr1 | 0.84288 | 0.07 | 5330437I02Rik | 0.57052 | -0.52 | Crybb1 | 0.53242 | 0.38 | Slc19a3 | 0.08638 | 0.59 |
| 51 | Map6d1 | 0.30559 | -0.11 | Dlx2 | 0.95684 | -0.03 | Kcnn3 | 0.88645 | 0.04 | Csf1r | 0.57408 | -0.11 | Kcnq1 | 0.69859 | 1.05 |
| 52 | Lpar1 | 0.00189 | -1.60 | Trim66 | 0.40654 | -0.13 | Ccdc37 | 0.96733 | -0.02 | Slc2a5 | 0.12560 | 0.94 | Angpt2 | 0.86610 | -0.11 |
| 53 | Tmeff2 | 0.14302 | -0.25 | Lhx6 | 0.09672 | -0.32 | Dio2 | 0.63696 | -0.10 | Il10ra | 0.19838 | 0.36 | Cd40 | N/A | N/A |
| 54 | C1ql1 | 0.03136 | -0.91 | Kcnh7 | 0.50654 | 0.08 | Fzd10 | 0.91595 | -0.06 | Lag3 | 0.95885 | 0.02 | Dll4 | N/A | N/A |
| 55 | Kndc1 | 0.14316 | -0.41 | Bcl11a | 0.68894 | 0.13 | Nat8 | 0.41376 | -0.51 | Laptm5 | 0.30013 | -0.34 | Serpinb6b | 0.20532 | 0.78 |
| 56 | Casr | 0.19673 | -2.32 | Dlx6 | 0.71847 | 0.22 | Sox9 | 0.25978 | 0.25 | Gpr157 | 0.22507 | 0.27 | Trim16 | 0.22392 | 1.09 |
| 57 | Cyp2j12 | 0.13562 | -1.01 | Klhl1 | 0.59262 | -0.22 | Fam181a | N/A | N/A | Rasal3 | 0.90946 | -0.06 | Flt4 | 0.37139 | 0.33 |
| 58 | Sec14l5 | 0.43786 | -0.27 | Dpysl5 | 0.60116 | -0.13 | Celsr1 | 0.08557 | -0.22 | Rhoh | 0.60584 | 0.58 | Mecom | 0.18671 | 0.87 |
| 59 | Kif19a | 0.23530 | 1.91 | Fibin | 0.72019 | -0.10 | Slc15a2 | 0.76321 | -0.10 | Adora3 | 0.29959 | 0.76 | Scarf1 | 0.63290 | -0.61 |
| 60 | Gpr62 | 0.54194 | -0.34 | A930038C07Rik | 0.32501 | 0.22 | Gm5089 | 0.35829 | -0.56 | Ccrl2 | 0.51093 | 0.12 | Igsf5 | 0.27918 | -0.55 |
| 61 | 3110035E14Rik | 0.31257 | 0.18 | Srrm4 | 0.79822 | -0.04 | Slc7a2 | 0.28182 | -0.10 | Hk3 | N/A | N/A | Ccbp2 | 0.57715 | 0.31 |
| 62 | Gpr37 | 0.02682 | -0.93 | Lhx8 | N/A | N/A | Aifm3 | 0.63755 | -0.18 | Slc11a1 | 0.26994 | 0.58 | Slfn5 | 0.18114 | 0.27 |
| 63 | Kcna1 | 0.62492 | -0.05 | Ntrk1 | N/A | N/A | Glis3 | 0.02138 | -0.75 | Vav1 | 0.58378 | 0.13 | Stap2 | N/A | N/A |
| 64 | Matn1 | N/A | N/A | Slc18a3 | N/A | N/A | AI464131 | 0.79573 | -0.02 | Retnla | N/A | N/A | Fam129a | 0.02479 | 1.57 |
| 65 | Tnni1 | 0.26960 | -0.74 | P2rx5 | 0.95930 | -0.07 | Vnn1 | 0.94481 | 0.65 | Il1b | 0.24280 | -0.62 | Mmp25 | 0.91001 | 0.03 |
| 66 | 5730559C18Rik | 0.67179 | 0.26 | Vmn2r1 | 0.36386 | -0.73 | Klri1 | N/A | N/A | Fcrls | 0.56909 | -0.22 | Itm2a | 0.24434 | 0.21 |
| 67 | Sgk2 | 0.24454 | -0.49 | Meg3 | 0.24455 | 0.39 | Myom3 | 0.68343 | 0.56 | Snx20 | N/A | N/A | Adh1 | N/A | N/A |
| 68 | Chst5 | 0.75041 | -0.39 | L1cam | 0.08036 | -0.27 | Slc7a10 | 0.43888 | 0.32 | Ltc4s | 0.85180 | -0.21 | Sema3g | N/A | N/A |
| 69 | Pnlip | 0.86503 | 0.24 | Celf4 | 0.49866 | 0.07 | Sctr | N/A | N/A | Irf5 | 0.21910 | 0.57 | BC020535 | 0.52927 | -0.48 |
| 70 | Lhfpl3 | 0.96104 | -0.02 | Ankrd35 | 0.75521 | -0.12 | Slc39a12 | 0.34327 | 0.21 | Cd68 | 0.65755 | -0.15 | Fn1 | 0.92329 | 0.03 |
| 71 | C030030A07Rik | 0.19231 | -0.31 | Nppc | 0.20697 | -1.14 | Mlc1 | 0.98518 | 0.00 | Hmha1 | 0.28757 | 0.31 | Adcy4 | 0.31835 | 0.78 |
| 72 | Prkcq | 0.06957 | -0.76 | Hs3st5 | 0.09592 | 0.52 | Ppp1r3g | 0.35990 | 0.32 | Fcgr1 | 0.90748 | -0.07 | She | 0.89305 | -0.07 |
| 73 | Adamts4 | 0.00337 | -1.18 | Bhlhe22 | 0.35367 | 0.24 | Pipox | 0.38552 | -0.86 | Cd52 | 0.42627 | 0.30 | Mfsd7c | 0.89176 | 0.09 |
| 74 | Bmp4 | 0.00236 | -1.56 | Tacr1 | 0.93595 | -0.04 | Frem2 | 0.01413 | 0.66 | Fermt3 | 0.49128 | 0.37 | C130074G19Rik | 0.16855 | 1.78 |
| 75 | Pllp | 0.01043 | -1.47 | Dync1i1 | 0.93230 | 0.02 | Notch3 | 0.70816 | 0.19 | Csf3r | 0.79244 | -0.09 | Ly6a | 0.97624 | -0.02 |
| 76 | Shc4 | 0.62145 | -0.19 | Robo2 | 0.76138 | 0.03 | Pamr1 | 0.53507 | 0.25 | Itgb2 | 0.12718 | -0.78 | Stra6 | 0.09865 | 0.44 |
| 77 | Tspan2 | 0.00225 | -1.43 | Tac2 | 0.30534 | -0.53 | Ephx2 | 0.12797 | -0.75 | AF251705 | 0.31490 | -0.77 | Igfbp7 | 0.08044 | 0.45 |
| 78 | Gng8 | 0.76032 | 0.42 | Lhfpl5 | 0.90924 | -0.06 | Slc1a3 | 0.22923 | 0.09 | Cbr2 | 0.76626 | 0.88 | Foxf2 | 0.14572 | -0.68 |
| 79 | Epcam | 0.75922 | -0.24 | Vstm2l | 0.98562 | 0.01 | Prdm16 | 0.44928 | 0.43 | Ptpn6 | 0.70469 | -0.25 | Megf6 | 0.13494 | -0.82 |
| 80 | Rnf43 | 0.22557 | -0.54 | Nkx2-1 | 0.17075 | 0.70 | Gm11627 | 0.65538 | 0.19 | Clec10a | 0.17725 | -0.45 | Hmcn1 | 0.35093 | 0.46 |
| 81 | Gm10863 | N/A | N/A | Gpr83 | 0.70535 | -0.18 | Trim9 | 0.70468 | 0.08 | Nlrp3 | 0.92299 | -0.05 | Pecam1 | 0.12073 | 0.67 |
| 82 | Barx2 | 0.87375 | 0.74 | Col25a1 | 0.72478 | 0.12 | Fzd2 | 0.00942 | -0.77 | Siglece | 0.44633 | 0.44 | Gm694 | N/A | N/A |
| 83 | Sp7 | 0.55705 | -0.98 | Gm514 | N/A | N/A | 2900052N01Rik | 0.69759 | 0.06 | Blnk | 0.43923 | 0.35 | Slc39a8 | 0.17185 | 0.59 |
| 84 | Sh3gl3 | 0.10076 | -0.47 | Chodl | 0.69929 | -1.24 | 2610034M16Rik | 0.60240 | 0.56 | Cryba4 | N/A | N/A | Egfl7 | 0.55038 | 0.30 |
| 85 | C1ql3 | 0.80585 | 0.03 | Ntn5 | 0.55625 | -0.61 | Gja1 | 0.49638 | 0.18 | Olfml3 | 0.86389 | -0.06 | Ptgis | 0.98830 | 0.02 |
| 86 | Atp10b | 0.00418 | -0.90 | Nxph3 | 0.59167 | -0.46 | 1700027L20Rik | N/A | N/A | Myo1g | 0.21773 | 2.10 | Gimap4 | 0.33105 | 0.41 |
| 87 | Aspa | 0.00071 | -1.69 | Stmn2 | 0.94704 | -0.01 | Crb2 | 0.05543 | 1.03 | Kcnk6 | 0.97061 | -0.01 | Ctsw | N/A | N/A |
| 88 | S100a3 | N/A | N/A | Plek2 | 0.38394 | -0.53 | Sypl2 | 0.35217 | -0.40 | C3ar1 | 0.61687 | 0.23 | 4930578C19Rik | 0.87214 | -0.14 |
| 89 | Sulf2 | 0.91554 | 0.02 | Syt1 | 0.21002 | 0.20 | 1700084C01Rik | 0.17940 | 0.44 | Tyrobp | 0.89447 | -0.10 | Itga4 | 0.89928 | 0.03 |
| 90 | Cryab | 0.06462 | -1.43 | Barhl2 | 0.40762 | -1.12 | Vcam1 | 0.41752 | 0.18 | Gp9 | N/A | N/A | Clec14a | 0.03186 | 1.06 |
| 91 | 1810041L15Rik | 0.00694 | -0.63 | Crhbp | 0.06589 | -0.30 | Ttpa | 0.09750 | 0.81 | Cd300lf | 0.88943 | -0.13 | Abcc6 | 0.50373 | -0.78 |
| 92 | Lrrn1 | 0.06333 | -0.55 | Abcc8 | 0.32200 | -0.28 | Pm20d1 | 0.10042 | -1.01 | Ang | 0.68195 | 0.18 | Csrp2 | 0.72544 | -0.29 |
| 93 | Tppp | 0.04393 | -0.18 | Gm14204 | 0.01862 | 0.39 | Adhfe1 | 0.87855 | -0.03 | Fgd2 | 0.38826 | -0.63 | Cgnl1 | 0.36171 | 0.38 |
| 94 | 3632451O06Rik | 0.88196 | 0.03 | Fibcd1 | 0.44892 | 0.22 | Rorb | 0.88815 | -0.02 | Ccl2 | N/A | N/A | Fam124b | 0.00127 | 2.32 |
| 95 | Rbpjl | 0.03948 | 1.61 | Gad2 | 0.92691 | -0.03 | 2900005J15Rik | 0.06468 | 0.64 | Pik3ap1 | 0.08740 | 0.54 | Sigirr | N/A | N/A |
| 96 | Rtkn2 | 0.00548 | -0.64 | Cpne7 | 0.94132 | -0.02 | Daam2 | 0.14719 | -0.55 | Fcgr3 | 0.65206 | -0.25 | Hmgcs2 | 0.77922 | -0.19 |
| 97 | Gpr15 | 0.68734 | 0.45 | Penk | 0.08807 | -0.96 | Tmem82 | 0.87395 | 0.07 | Ch25h | N/A | N/A | Gimap8 | 0.33950 | 0.40 |
| 98 | Tubb4 | N/A | N/A | Hs6st3 | 0.52609 | 0.12 | Rgs20 | 0.90172 | -0.02 | BC013712 | 0.58103 | 0.35 | Gja4 | 0.69492 | 0.10 |
| 99 | Megf11 | 0.52952 | 0.06 | Tubb3 | 0.55481 | -0.17 | Abcd2 | 0.32016 | 0.17 | Ccr1 | N/A | N/A | 8430408G22Rik | N/A | N/A |
| 100 | S100b | 0.31323 | -0.21 | Rian | 0.15114 | 0.41 | Lrig1 | 0.76795 | -0.07 | Il21r | 0.54498 | 0.37 | Cd34 | 0.95927 | -0.01 |
| 101 | Nfasc | 0.11766 | -0.61 | Kcnc2 | 0.05340 | 0.36 | Gm266 | 0.98916 | 0.01 | Cxcl16 | 0.14340 | 1.21 | Higd1b | 0.55241 | 0.89 |
| 102 | Lum | 0.53056 | 0.30 | Vgf | 0.73624 | -0.05 | Slc7a11 | 0.51271 | 0.27 | Rac2 | 0.90977 | 0.03 | 2610019F03Rik | 0.13403 | -0.35 |
| 103 | Pcdh15 | 0.24566 | 0.44 | Mirg | 0.98769 | 0.01 | Cldn10 | 0.98158 | -0.01 | Nfam1 | 0.00884 | 1.37 | Ptprb | 0.50249 | 0.14 |
| 104 | Sirt2 | 0.00565 | -0.80 | Htr3a | 0.34669 | -0.52 | Fam20a | 0.55873 | 0.20 | Alox5ap | 0.66992 | 0.15 | Rnf125 | 0.83250 | -0.10 |
| 105 | Olig1 | 0.02537 | -0.65 | Bcl11b | 0.91150 | 0.03 | Ranbp3l | 0.18671 | 0.18 | Tnfaip8l2 | 0.64867 | 0.04 | Adamtsl2 | 0.97529 | 0.56 |
| 106 | Sema5a | 0.19185 | -0.46 | Syt4 | 0.10590 | 0.18 | Elovl2 | 0.05942 | 0.32 | Ccdc88b | 0.93278 | 0.03 | Hrct1 | N/A | N/A |
| 107 | Bace2 | 0.34808 | 0.59 | Cdh8 | 0.19599 | 0.20 | Palld | 0.05410 | 1.22 | Susd3 | N/A | N/A | Egfl8 | 0.95878 | -0.06 |
| 108 | Dusp15 | 0.78927 | 0.07 | Kctd8 | 0.81746 | 0.06 | Slc2a10 | 0.92444 | -0.07 | Fcna | N/A | N/A | Foxf1a | N/A | N/A |
| 109 | Carns1 | 0.60991 | -0.38 | Drd2 | 0.72510 | -0.17 | Igsf1 | 0.13813 | 0.37 | Asb2 | 0.10143 | 0.59 | Sox18 | 0.88574 | -0.11 |
| 110 | Slpi | N/A | N/A | Gpr12 | 0.88893 | -0.03 | Aass | 0.71682 | -0.14 | Nfkbid | 0.34659 | 1.29 | Gm1987 | N/A | N/A |
| 111 | Slc44a1 | 0.00413 | -0.81 | Samd3 | 0.81193 | 0.30 | Slc25a18 | 0.26796 | -0.27 | Myo1f | 0.94598 | -0.05 | 2310046K01Rik | 0.59494 | 0.22 |
| 112 | Fam180a | 0.14265 | 1.70 | Insm2 | N/A | N/A | Sfrp5 | N/A | N/A | Arhgap9 | N/A | N/A | Pltp | 0.29767 | 0.24 |
| 113 | Cdk18 | 0.03036 | -0.93 | Fam131c | 0.49068 | 0.30 | F3 | 0.74703 | 0.07 | Emr1 | 0.96482 | 0.03 | Exoc3l | 0.48644 | 0.54 |
| 114 | Sytl2 | 0.13300 | -0.45 | Elavl2 | 0.18575 | 0.46 | Fabp7 | 0.20717 | 0.51 | Parvg | 0.40700 | -0.35 | Marveld2 | 0.14339 | -0.40 |
| 115 | Pdlim2 | 0.02058 | -2.12 | Trank1 | 0.92447 | 0.02 | B230209K01Rik | 0.50258 | -0.40 | Ccl7 | N/A | N/A | Arhgap29 | 0.75826 | 0.12 |
| 116 | Enpp2 | 0.76231 | 0.16 | Synpr | 0.73621 | -0.06 | Fgfbp3 | 0.60269 | -0.21 | Cd74 | 0.05158 | 1.30 | Gm5 | N/A | N/A |
| 117 | Lad1 | 0.42293 | -0.55 | Fam183b | 0.96109 | -0.04 | Emp2 | 0.16941 | -0.35 | Card9 | 0.01122 | 1.55 | Clic5 | 0.26191 | 0.29 |
| 118 | Bfsp2 | 0.41909 | -0.27 | Ccbe1 | 0.63531 | 0.15 | Pdk4 | 0.96682 | 0.01 | Pla2g15 | 0.07010 | 0.34 | Itga1 | 0.26405 | 0.49 |
| 119 | Phlda3 | 0.49984 | -0.42 | Celsr3 | 0.59421 | 0.08 | Acsbg1 | 0.36328 | -0.21 | Ncf2 | 0.64459 | -0.15 | Rai14 | 0.38901 | 0.34 |
| 120 | Col11a2 | 0.23823 | -1.01 | Galntl6 | 0.24145 | 0.29 | Kcne1l | 0.60205 | -0.32 | Plau | 0.65172 | 1.14 | Tnfsf10 | 0.66701 | 0.10 |
| 121 | Ppap2c | 0.50120 | -0.30 | Lrrc3b | 0.19347 | -0.41 | Ncan | 0.47909 | -0.16 | Nckap1l | 0.47886 | 0.25 | Il2rg | 0.12979 | 2.66 |
| 122 | Tmem117 | 0.81941 | -0.12 | Bmp5 | 0.04600 | -1.17 | Igfbp2 | 0.74711 | 0.10 | Ccr5 | 0.87881 | 0.09 | Slc16a1 | 0.10177 | 0.42 |
| 123 | Dpyd | 0.49592 | 0.17 | BC005764 | 0.27867 | -0.28 | Cd44 | 0.21422 | 0.59 | Lyz2 | 0.27512 | 0.67 | Tmem154 | 0.19594 | -1.11 |
| 124 | Fam19a4 | 0.36911 | 0.52 | Ndst4 | 0.86560 | 0.06 | 1500002O10Rik | N/A | N/A | Fam167b | N/A | N/A | Rasip1 | 0.03193 | -1.62 |
| 125 | Tmod1 | 0.11749 | -0.49 | Cd274 | 0.89691 | -0.08 | Greb1 | 0.34721 | 0.50 | Fcer1g | 0.14852 | -0.31 | Kitl | 0.35854 | 0.35 |
| 126 | Prr18 | 0.02808 | -1.22 | E330013P04Rik | 0.71464 | -0.11 | Gpc4 | 0.35461 | -0.15 | Il12b | 0.89657 | -0.21 | Tbx1 | N/A | N/A |
| 127 | Lrrtm3 | 0.79151 | -0.07 | Crh | 0.08331 | 1.51 | Hes5 | 0.13575 | -0.84 | Slamf9 | 0.84845 | 0.27 | Grrp1 | N/A | N/A |
| 128 | D7Ertd443e | 0.45567 | -0.63 | Igsf9 | 0.90379 | 0.06 | Slc1a2 | 0.74690 | 0.04 | Ms4a6d | N/A | N/A | Rhoj | 0.58598 | 0.34 |
| 129 | Gamt | 0.00530 | -1.34 | Kcnb2 | 0.31831 | 0.17 | Tlcd1 | 0.65183 | 0.16 | Fcgr2b | 0.91296 | 0.04 | Tnfrsf10b | 0.74899 | 0.16 |
| 130 | Gsx1 | N/A | N/A | Stk32b | 0.20629 | -0.42 | Thbs1 | 0.25107 | -0.77 | Ccl24 | N/A | N/A | Gm14207 | N/A | N/A |
| 131 | Pstpip2 | 0.30587 | -0.28 | Xkr7 | 0.77002 | 0.36 | Dzip1l | 0.80673 | -0.08 | Tnni2 | N/A | N/A | Kcnj8 | 0.79635 | -0.20 |
| 132 | Rab33a | 0.67703 | -0.31 | Slc17a8 | 0.96679 | -0.01 | AI507597 | N/A | N/A | Siglech | 0.93814 | -0.01 | Sdpr | 0.70612 | -0.06 |
| 133 | Cpox | 0.71312 | 0.13 | Cpne5 | 0.54838 | 0.19 | LOC433374 | 0.50200 | 0.12 | Angptl7 | 0.12453 | 0.82 | Pgm5 | 0.83526 | -0.13 |
| 134 | A930003O13Rik | 0.70629 | 0.24 | 6430598A04Rik | 0.81653 | 0.08 | Gfap | 0.67684 | -0.08 | Cd209f | 0.40615 | -1.73 | Cdkn2b | N/A | N/A |
| 135 | Pex5l | 0.31202 | -0.34 | Neurod1 | 0.17121 | -0.24 | Ezr | 0.82140 | 0.08 | Psd4 | 0.77023 | 0.33 | Vwa1 | 0.83132 | 0.08 |
| 136 | Tmem132d | 0.38636 | -0.27 | Th | 0.90896 | 0.16 | Loxl1 | 0.22878 | 0.69 | Pik3r5 | 0.62902 | 0.18 | Fam101b | 0.91378 | -0.02 |
| 137 | Ano4 | 0.02098 | -0.40 | Crmp1 | 0.51226 | -0.06 | Lipg | 0.48242 | 0.30 | Csf2rb | 0.53773 | 0.19 | Zfp366 | 0.96332 | -0.03 |
| 138 | Plekhg3 | 0.01337 | -0.91 | Mme | 0.65115 | 0.07 | Tst | 0.15926 | -0.51 | Cx3cr1 | 0.90253 | 0.04 | Nos2 | N/A | N/A |
| 139 | Snx22 | 0.53726 | -0.20 | Amy1 | 0.81284 | 0.11 | Ppap2b | 0.80700 | -0.04 | Clec4n | 0.81848 | 0.26 | Fzd6 | 0.26930 | 0.75 |
| 140 | Ndrg1 | 0.01032 | -0.82 | Myt1l | 0.05453 | 0.26 | Veph1 | 0.94172 | -0.05 | H2-DMb1 | 0.54657 | -0.03 | Gkn3 | 0.36935 | 1.26 |
| 141 | Pmel | N/A | N/A | Ndrg4 | 0.44619 | -0.04 | Slc13a5 | 0.99893 | 0.00 | Was | 0.20935 | 0.61 | Dpp4 | 0.11675 | 1.09 |
| 142 | Dcn | 0.23809 | 0.42 | Necab1 | 0.75068 | 0.12 | Rfx4 | 0.27210 | 0.31 | Inpp5d | 0.44957 | -0.40 | Ces2b | N/A | N/A |
| 143 | Stk32a | 0.83065 | -0.07 | Ina | 0.63895 | -0.07 | Grin2c | 0.31377 | 0.20 | Ugt1a7c | N/A | N/A | Acss3 | 0.60788 | 0.10 |
| 144 | Gm410 | 0.90227 | -0.07 | Rgs8 | 0.06709 | -0.33 | Slc13a3 | 0.39263 | -0.38 | Lrmp | 0.53018 | 0.01 | Foxl2 | N/A | N/A |
| 145 | Sulf1 | 0.07490 | 0.47 | Sphkap | 0.80538 | 0.03 | Elf5 | N/A | N/A | Cd86 | 0.49762 | -0.59 | Grb7 | 0.97827 | -0.02 |
| 146 | Eml1 | 0.71971 | -0.12 | Cpne4 | 0.99968 | 0.00 | Fjx1 | 0.73744 | -0.11 | Tnfrsf1b | 0.51907 | 0.22 | St6galnac2 | 0.21615 | 0.29 |
| 147 | Ppp1r16b | 0.11071 | -0.37 | 3110047P20Rik | 0.92597 | 0.02 | Fras1 | 0.06440 | -0.19 | Arl11 | N/A | N/A | Sgpp2 | 0.87395 | -0.03 |
| 148 | Elovl7 | 0.13193 | -0.54 | Calb2 | 0.67481 | -0.22 | Megf10 | 0.78349 | 0.05 | Wdfy4 | 0.15012 | 0.76 | Arhgef5 | 0.29847 | -0.25 |
| 149 | Plekhh1 | 0.00644 | -2.04 | 2410076I21Rik | 0.22429 | -0.41 | Slc27a1 | 0.64275 | -0.10 | P2ry13 | 0.96245 | 0.01 | Mmrn1 | 0.02199 | 1.95 |
| 150 | Dusp9 | N/A | N/A | Gap43 | 0.89746 | -0.04 | 2810055G20Rik | 0.09757 | 0.56 | Plcb2 | 0.23173 | 0.38 | Hspa12b | 0.04922 | 1.11 |
| 151 | Serpind1 | 0.34417 | -0.56 | Ajap1 | 0.31954 | -0.31 | Lrrc23 | 0.18589 | 0.77 | Irf4 | 0.53306 | 0.13 | Nox4 | 0.93057 | -0.07 |
| 152 | Chadl | 0.50414 | -0.62 | Casz1 | 0.08219 | 0.39 | Pla2g7 | 0.06038 | -0.27 | Tnfrsf17 | N/A | N/A | Tbx3 | 0.84258 | -0.12 |
| 153 | Acan | 0.38783 | 0.21 | Cacng2 | 0.98977 | 0.00 | Mfge8 | 0.75375 | -0.06 | Batf | N/A | N/A | 5430407P10Rik | 0.08028 | 0.87 |
| 154 | Tmprss5 | N/A | N/A | Kcnip4 | 0.65260 | -0.11 | Gabrb1 | 0.14580 | 0.23 | Lefty1 | 0.79882 | 0.34 | Atp10a | 0.95769 | -0.03 |
| 155 | Adam12 | 0.80486 | 0.10 | Eomes | 0.44119 | 0.34 | Ccno | 0.69788 | 0.65 | Capn3 | 0.01090 | -0.90 | Pdgfd | 0.96091 | 0.02 |
| 156 | Smtnl2 | 0.56917 | 0.15 | Dmrt3 | 0.26694 | 1.06 | Pax6 | 0.05357 | 0.39 | Cd33 | 0.44601 | 0.20 | Gata2 | 0.26921 | -0.68 |
| 157 | Gltp | 0.02723 | -1.33 | 2700090O03Rik | 0.42686 | 0.17 | Rdh5 | 0.62735 | 1.05 | Hcls1 | 0.61263 | 0.16 | Bcl6b | 0.93364 | -0.05 |
| 158 | Rtkn | 0.16763 | -0.69 | Prokr2 | 0.85020 | 0.04 | Dynlrb2 | 0.17637 | 1.24 | Unc93b1 | 0.98345 | -0.01 | Ttr | 0.16719 | 4.65 |
| 159 | Cpm | 0.04832 | -1.20 | Epha6 | 0.03393 | 0.35 | Cyp4f14 | 0.61966 | 0.34 | Cst7 | 0.03294 | 1.08 | Notum | N/A | N/A |
| 160 | Mc5r | N/A | N/A | Scg2 | 0.29043 | -0.28 | Hsd11b1 | 0.39944 | 0.23 | Runx1 | 0.61118 | 0.21 | Ppic | 0.15173 | -0.92 |
| 161 | Prkg2 | 0.90320 | -0.07 | Adcyap1 | 0.96665 | 0.02 | Adora2b | 0.80324 | -0.16 | Cyth4 | 0.17293 | -0.64 | Cdc42ep3 | 0.30828 | -0.58 |
| 162 | Gria3 | 0.65863 | -0.04 | Thsd7b | 0.11395 | 0.57 | Alpk3 | 0.35449 | 2.06 | Zc3h12a | 0.80499 | -0.05 | Thsd1 | 0.38659 | 0.57 |
| 163 | Btbd16 | 0.31003 | 0.09 | Ablim3 | 0.26181 | -0.29 | Gm17455 | N/A | N/A | Arhgap4 | 0.53808 | 0.25 | Lipc | N/A | N/A |
| 164 | Cntn1 | 0.67852 | 0.04 | Gpr22 | 0.58935 | 0.08 | Folh1 | 0.32931 | -0.18 | Hexb | 0.23898 | -0.21 | Fgd5 | 0.72952 | -0.13 |
| 165 | Pou3f1 | 0.49779 | -0.39 | Chrm3 | 0.52624 | -0.18 | Btbd17 | 0.70813 | 0.08 | Tmem52 | N/A | N/A | Slc35f2 | 0.55442 | 0.18 |
| 166 | Ldb3 | 0.67379 | -0.16 | Gabrg2 | 0.16512 | 0.29 | Vit | 0.67140 | 0.18 | Lpcat2 | 0.14658 | -0.28 | Mill2 | N/A | N/A |
| 167 | Cmtm5 | 0.01666 | -0.79 | Lhx9 | 0.28233 | 0.25 | Alpl | 0.67376 | -0.24 | P2rx1 | 0.34583 | 0.88 | N4bp3 | 0.57336 | 0.46 |
| 168 | Nt5e | 0.47498 | 0.19 | Isl1 | 0.58750 | 1.13 | Ltbp1 | 0.55324 | 0.24 | Lst1 | 0.28913 | -1.48 | Sox7 | 0.14802 | 0.24 |
| 169 | Tmem151a | 0.96132 | -0.01 | Fam196a | 0.37042 | 0.29 | Lcat | 0.43919 | -0.21 | Ms4a6c | 0.93996 | 0.04 | Podxl | 0.09871 | -0.41 |
| 170 | Il1rap | 0.21681 | -0.14 | Kcnmb2 | 0.16982 | 0.48 | Ngef | 0.32634 | -0.21 | Ms4a6b | 0.78123 | 0.27 | Cast | 0.50153 | -0.25 |
| 171 | A430107P09Rik | 0.81255 | 0.12 | Rims3 | 0.29891 | -0.48 | Gpam | 0.66371 | 0.15 | 5031414D18Rik | 0.42498 | -0.63 | Col4a2 | 0.10454 | 0.44 |
| 172 | Anks1b | 0.57872 | -0.07 | Nr2f2 | 0.75702 | -0.16 | Agt | 0.32434 | -0.45 | Mgl2 | 0.19742 | 0.55 | Meox1 | 0.68487 | 0.65 |
| 173 | Lims2 | 0.26264 | -0.64 | Ache | 0.76407 | 0.10 | Mylk2 | 0.58882 | -0.65 | Icosl | 0.61315 | 0.14 | Vsig2 | 0.27667 | -0.44 |
| 174 | Adssl1 | 0.61227 | 0.35 | Zic4 | 0.37795 | 0.65 | AW011738 | 0.95288 | 0.01 | Ccl6 | 0.77492 | 0.30 | Apcdd1 | 0.95767 | -0.01 |
| 175 | Cspg4 | 0.51478 | -0.18 | Car10 | 0.23686 | -0.50 | Olfml1 | 0.05324 | -0.70 | H2-Eb1 | 0.00344 | 1.05 | Ptrf | 0.10651 | -0.52 |
| 176 | Il12rb1 | 0.73840 | -0.18 | Gpr26 | 0.45960 | -0.23 | Raver2 | 0.12344 | 0.34 | Il1a | 0.77298 | 0.24 | Procr | N/A | N/A |
| 177 | Rab37 | 0.69528 | -0.65 | Wscd2 | 0.12328 | -0.22 | Erbb2 | 0.17318 | 0.47 | Ms4a7 | N/A | N/A | Ctla2b | 0.45574 | 1.72 |
| 178 | Ppapdc1a | 0.47831 | 0.36 | Atp1a3 | 0.66475 | 0.04 | 3930402G23Rik | N/A | N/A | Fam26f | 0.69054 | -0.94 | Arhgap28 | 0.66735 | -0.08 |
| 179 | Nol3 | 0.32507 | -0.28 | Rtbdn | 0.93056 | 0.05 | Muc1 | 0.94381 | -0.09 | Tnfaip2 | 0.78439 | -0.36 | Zic3 | 0.20597 | 1.51 |
| 180 | Slitrk3 | 0.88985 | -0.02 | Rem2 | 0.23186 | -0.65 | Arhgef26 | 0.16866 | 0.25 | Rab20 | N/A | N/A | Kank4 | 0.97494 | -0.01 |
| 181 | Slain1 | 0.01215 | -0.48 | Slc6a7 | 0.46144 | 0.17 | 3110082D06Rik | 0.41605 | 0.13 | Lpxn | 0.31797 | 1.05 | Dennd3 | 0.37850 | -0.57 |
| 182 | 6330406I15Rik | 0.27156 | -0.23 | Epha8 | 0.46480 | -0.64 | Dbx2 | 0.98790 | 0.01 | Hvcn1 | 0.34673 | 0.44 | Gpihbp1 | N/A | N/A |
| 183 | Sox8 | 0.09163 | -0.48 | Gad1 | 0.65198 | 0.14 | Nat1 | 0.43960 | -0.56 | Mpeg1 | 0.33683 | 0.27 | Dysf | 0.63272 | 0.41 |
| 184 | Tyro3 | 0.09911 | -0.35 | Usp29 | 0.60567 | 0.15 | Hapln1 | 0.57245 | 0.11 | Lpar5 | N/A | N/A | Serpina3h | 0.80580 | 0.89 |
| 185 | Ephb1 | 0.11446 | -0.33 | Cyp4x1 | 0.29192 | 0.54 | 4932438H23Rik | 0.50850 | -0.62 | Pf4 | 0.66699 | -0.59 | Rab11fip1 | 0.00117 | 0.48 |
| 186 | Josd2 | 0.18835 | -0.83 | Gjd2 | 0.14506 | 0.61 | Amot | 0.54120 | 0.13 | Il16 | 0.77682 | 0.11 | BC028528 | 0.82252 | 0.14 |
| 187 | Galnt3 | 0.97379 | -0.01 | Nrn1 | 0.15138 | -0.32 | Aox1 | 0.88627 | 0.05 | H2-DMb2 | N/A | N/A | Gm6792 | N/A | N/A |
| 188 | Mobkl2b | N/A | N/A | Plekha7 | 0.61429 | 0.14 | Cyp1b1 | 0.45562 | 0.27 | Itgam | 0.16480 | 0.46 | Rhod | N/A | N/A |
| 189 | Abca6 | 0.28810 | 0.38 | L3mbtl1 | 0.41316 | 0.32 | Ggnbp1 | 0.21072 | -0.60 | Ebi3 | 0.57990 | -0.04 | Lama4 | 0.22165 | 0.84 |
| 190 | Slco3a1 | 0.61679 | -0.12 | Gm16532 | 0.17900 | 0.77 | Prrx2 | N/A | N/A | Pycard | 0.13034 | -0.93 | Samd9l | 0.16787 | 0.47 |
| 191 | Shisa4 | 0.02161 | -0.74 | Prlhr | N/A | N/A | Gjb6 | 0.11714 | -0.27 | Slc37a2 | 0.41230 | 0.82 | Zap70 | 0.98132 | -0.01 |
| 192 | Phldb1 | 0.01326 | -0.85 | Kcnq5 | 0.57599 | 0.11 | Tsku | 0.27397 | 0.55 | Clec4a2 | 0.45372 | 0.46 | Ebf1 | 0.24544 | -0.56 |
| 193 | Tppp3 | 0.12207 | -0.62 | Cbln4 | 0.46127 | 0.39 | A930001A20Rik | N/A | N/A | 4632428N05Rik | 0.40193 | -0.28 | Tbx4 | N/A | N/A |
| 194 | B3gnt9-ps | 0.09400 | -0.52 | Oxtr | 0.75359 | -0.11 | Mtmr11 | 0.86925 | 0.07 | Glipr1 | 0.21539 | -0.53 | Rgs5 | 0.01178 | 0.74 |
| 195 | Tprn | 0.03378 | -1.35 | Prtn3 | N/A | N/A | Plch1 | 0.23739 | 0.50 | Myo7a | 0.96928 | -0.01 | Foxc1 | 0.51691 | 0.41 |
| 196 | Fam178b | N/A | N/A | Cnr1 | 0.06707 | 0.52 | Ucp3 | 0.60454 | -0.23 | Lyz1 | 0.57920 | -0.44 | Acer2 | 0.21811 | 0.80 |
| 197 | 4833424O15Rik | 0.81594 | 0.07 | Kcns2 | 0.47605 | -0.20 | Ccnd2 | 0.05340 | 0.33 | H2-Ob | N/A | N/A | Acvrl1 | 0.32319 | 0.74 |
| 198 | Col9a3 | 0.72495 | 0.33 | Efna3 | 0.98230 | -0.01 | Acsf2 | 0.17577 | -0.37 | Gbgt1 | N/A | N/A | Tinagl1 | 0.82450 | 0.16 |
| 199 | Wnt10a | 0.37004 | 0.83 | Rxfp1 | 0.32067 | 0.62 | Mapk4 | 0.00150 | -0.23 | Ctss | 0.68686 | 0.15 | Bsg | 0.18091 | -0.15 |
| 200 | 1700001P01Rik | N/A | N/A | AW551984 | 0.69495 | -0.38 | Nphp3 | 0.63706 | -0.22 | Fam83g | N/A | N/A | Vwf | 0.11040 | 1.02 |
| 201 | Gpd1 | 0.20921 | -0.40 | Gabra5 | 0.41234 | -0.29 | Acsl6 | 0.12356 | -0.24 | Hmga2-ps1 | 0.27520 | 0.43 | Ppm1j | N/A | N/A |
| 202 | 4933413G19Rik | 0.21968 | 1.16 | Fam159b | 0.59188 | -1.37 | Sfxn5 | 0.96129 | 0.01 | 6030468B19Rik | N/A | N/A | Ecm1 | 0.98180 | 0.01 |
| 203 | Trp53inp2 | 0.17896 | -0.32 | Lrrc26 | 0.95479 | -0.02 | Ddo | 0.82047 | 0.08 | Dennd1c | 0.60803 | 0.36 | Ankrd37 | 0.14828 | 0.76 |
| 204 | Chrna4 | 0.55101 | -0.13 | Baiap3 | 0.15502 | -1.22 | Itga2 | 0.59643 | 0.34 | Ikzf1 | 0.36393 | 0.23 | Nid1 | 0.72470 | -0.08 |
| 205 | Slc45a3 | 0.08904 | 0.68 | Cacna1b | 0.59222 | 0.10 | Ptch1 | 0.94453 | 0.01 | Ticam2 | 0.27316 | -0.90 | Il1r1 | 0.51536 | 0.29 |
| 206 | Scrg1 | 0.16836 | -0.21 | Zcchc12 | 0.46891 | -0.45 | Dtna | 0.21659 | -0.19 | Csf2rb2 | 0.77430 | 0.11 | Col4a1 | 0.38908 | 0.46 |
| 207 | Wnt3 | N/A | N/A | Zic1 | 0.33060 | 1.57 | Ptpn13 | 0.56143 | -0.13 | Tlr7 | 0.80604 | -0.08 | St8sia4 | 0.17588 | 0.55 |
| 208 | Pppde2 | 0.08453 | -0.49 | Sv2b | 0.44738 | -0.09 | Htra1 | 0.99727 | 0.00 | Cd180 | 0.65465 | -0.15 | Tfrc | 0.09659 | 0.11 |
| 209 | Padi2 | 0.50812 | 0.06 | Ybx2 | 0.14293 | -0.69 | Spata3 | 0.05847 | 1.90 | Abi3 | 0.89966 | 0.04 | Anxa1 | N/A | N/A |
| 210 | Nkx2-2 | 0.59109 | -0.29 | Dact1 | 0.94381 | -0.02 | C4b | 0.19270 | 0.64 | Aif1 | 0.85708 | -0.16 | Kcne3 | 0.40035 | 1.73 |
| 211 | Prima1 | N/A | N/A | Col24a1 | 0.46769 | -0.53 | Frmpd1 | 0.51917 | -0.20 | Hcst | N/A | N/A | Uaca | 0.63228 | 0.23 |
| 212 | Tmem108 | 0.16681 | -0.39 | Scrt2 | 0.86394 | -0.08 | Capsl | 0.63596 | 0.23 | Neurl3 | 0.60640 | 0.13 | Abcc9 | 0.69045 | -0.08 |
| 213 | Lingo3 | 0.14434 | -0.78 | Erc2 | 0.31654 | 0.13 | Lrrc9 | 0.51264 | 0.40 | Adrb2 | 0.50183 | 0.86 | Lamb1 | 0.09727 | 0.22 |
| 214 | Rnd2 | 0.42154 | 0.30 | Gm10035 | N/A | N/A | Slc13a1 | 0.20356 | -0.84 | Cebpa | 0.54803 | -0.18 | Ism1 | 0.12381 | -0.74 |
| 215 | Aatk | 0.76491 | -0.07 | 2610018G03Rik | 0.44840 | -0.35 | Egfl6 | 0.59728 | -0.16 | Ctsd | 0.03626 | -0.28 | Palmd | 0.75026 | -0.07 |
| 216 | Col20a1 | 0.54198 | -0.26 | Hspa12a | 0.82731 | -0.01 | Rasa2 | 0.66394 | 0.09 | Mlxipl | 0.46866 | -0.40 | Ifitm1 | 0.55430 | 0.35 |
| 217 | Pigz | 0.14815 | -1.44 | Celf5 | 0.56891 | -0.12 | Msx2 | 0.77572 | 0.14 | Cd5 | N/A | N/A | Ecm2 | 0.99528 | 0.00 |
| 218 | Sorcs1 | 0.52062 | -0.20 | Rhov | 0.27337 | 0.68 | Gabrg1 | 0.49185 | 0.30 | Lyve1 | 0.12690 | -0.97 | Slco2a1 | 0.49653 | 0.06 |
| 219 | Pycr1 | 0.74140 | 0.11 | Gria1 | 0.46126 | 0.11 | Atp1a2 | 0.14565 | -0.10 | Il4i1 | N/A | N/A | Kank3 | 0.35522 | -0.74 |
| 220 | Adamts2 | 0.26801 | 0.80 | Cdh4 | 0.62367 | -0.26 | Rbpms2 | 0.26907 | 0.55 | Rbm47 | 0.59486 | 0.39 | Clec1a | 0.04803 | 0.38 |
| 221 | Dmrta1 | 0.57602 | -0.32 | Col6a2 | 0.29731 | 0.44 | 3110079O15Rik | N/A | N/A | Coro1a | 0.88031 | 0.06 | Car5a | 0.45004 | -0.35 |
| 222 | Aplp1 | 0.11806 | -0.40 | Epha3 | 0.28259 | 0.35 | Lrrc38 | 0.26869 | -0.74 | Clec4a1 | 0.04750 | 1.49 | Ifi47 | 0.01498 | 1.11 |
| 223 | Dscam | 0.69857 | -0.08 | Kctd16 | 0.72170 | 0.08 | Tril | 0.71837 | 0.10 | Dok3 | 0.65965 | 0.44 | Snora21 | N/A | N/A |
| 224 | C1ql2 | 0.41330 | -0.60 | Fam123c | 0.65463 | -0.10 | 4930579J09Rik | N/A | N/A | Ccr6 | 0.18161 | 1.43 | S100a11 | 0.04150 | 0.52 |
| 225 | Tspan15 | 0.93895 | -0.01 | A230073K19Rik | 0.07910 | 0.49 | C030037D09Rik | 0.74884 | -0.19 | Ly86 | 0.22452 | 0.65 | Filip1 | 0.23064 | -0.45 |
| 226 | Cacng4 | 0.08061 | -0.80 | Chat | 0.77887 | -0.27 | D030047H15Rik | 0.42823 | -0.31 | Fam105a | 0.95879 | -0.01 | Best1 | 0.92518 | 0.06 |
| 227 | Adamtsl3 | 0.51430 | -0.59 | Kcna4 | 0.18777 | 0.29 | Six5 | 0.11760 | 1.38 | Gm10790 | 0.29732 | 0.61 | Nlrc3 | 0.89465 | -0.11 |
| 228 | Galnt13 | 0.90480 | -0.02 | Gcgr | N/A | N/A | Car5b | 0.86486 | -0.04 | Traf3ip3 | 0.59412 | -0.05 | Gpr124 | 0.61862 | -0.24 |
| 229 | Omg | 0.19679 | -0.33 | Cntnap4 | 0.43365 | 0.23 | 9430041J12Rik | 0.06059 | -0.45 | Ngp | N/A | N/A | Chrnb1 | 0.31865 | 0.81 |
| 230 | Hist1h2be | 0.73894 | -0.12 | Hcn1 | 0.34567 | 0.15 | Id4 | 0.98849 | 0.00 | Slco4a1 | 0.79930 | -0.13 | Tnfrsf11b | 0.20768 | -0.51 |
| 231 | S100a1 | 0.27081 | -0.30 | Foxo6 | 0.31603 | 0.27 | Scara3 | 0.00411 | -1.13 | 2610528A11Rik | 0.77308 | 0.85 | Gimap9 | 0.57712 | -0.53 |
| 232 | Dll3 | 0.71826 | 0.95 | Fam150b | 0.25587 | 1.15 | Atp1b2 | 0.22023 | -0.19 | Itgb5 | 0.21156 | -0.22 | Aspn | 0.14452 | 0.74 |
| 233 | Anln | 0.32169 | -0.37 | Trhde | 0.11686 | 0.16 | A830093I24Rik | 0.11871 | 0.62 | Cd48 | 0.46040 | -0.68 | Slc26a10 | 0.40141 | 0.72 |
| 234 | Fam5c | 0.98764 | -0.01 | Cacna2d1 | 0.54229 | 0.11 | 1700007K13Rik | 0.67169 | -0.18 | Il6ra | 0.62998 | -0.10 | Dok4 | 0.34708 | 0.21 |
| 235 | Ephx4 | 0.53547 | 0.09 | Grip2 | 0.25105 | 0.70 | 1700003M07Rik | 0.67049 | 0.09 | Ttc7 | 0.93653 | 0.05 | Trpm6 | 0.06256 | 0.71 |
| 236 | Zfp365 | 0.71521 | 0.03 | Tmem200a | 0.45340 | 0.14 | Bhlhe40 | 0.34255 | -0.26 | Cmtm7 | 0.76311 | 0.32 | Tfpi2 | 0.23620 | 1.03 |
| 237 | Nxph1 | 0.25757 | 0.19 | Htr7 | 0.58522 | 0.25 | Acot11 | 0.34888 | 0.20 | Siglec5 | 0.61327 | 0.07 | Dbh | N/A | N/A |
| 238 | Slc5a11 | 0.98944 | -0.57 | Pdcd1lg2 | 0.67968 | -0.28 | Igdcc4 | 0.46337 | -0.20 | Batf3 | N/A | N/A | Efna1 | 0.94179 | 0.03 |
| 239 | Ddr1 | 0.20656 | -0.42 | Doc2b | 0.23883 | -0.21 | Mtap7d3 | 0.93225 | 0.11 | Btk | 0.70393 | -0.96 | Kcp | 0.20926 | 0.79 |
| 240 | Capn5 | 0.06960 | -0.29 | Nhlh1 | 0.82445 | 0.12 | Ppil6 | 0.08861 | 0.31 | Dock8 | 0.03536 | 0.60 | P2ry14 | 0.65115 | -0.08 |
| 241 | Arhgef10 | 0.00276 | -1.02 | Neurod2 | 0.47093 | -0.25 | Klf15 | 0.94180 | 0.04 | Unc13d | N/A | N/A | Adm | 0.27922 | -0.76 |
| 242 | Slc6a19 | N/A | N/A | A830018L16Rik | 0.09872 | 0.16 | Tpbg | 0.26025 | 0.26 | Rgs1 | 0.91711 | -0.73 | Arhgef15 | 0.62298 | -0.16 |
| 243 | Thsd4 | 0.54859 | -0.14 | Slc38a4 | 0.76895 | 0.23 | Ptprz1 | 0.21034 | 0.06 | Rtn4rl1 | 0.72248 | -0.08 | Timp1 | N/A | N/A |
| 244 | Tmem141 | 0.04560 | 1.04 | Nrg3 | 0.10773 | 0.23 | Syne1 | 0.39788 | 0.10 | Rgs10 | 0.29339 | -0.50 | Akap2 | 0.20281 | -0.16 |
| 245 | Nkain1 | 0.01739 | -0.42 | Ndst3 | 0.29134 | 0.20 | G530011O06Rik | 0.60206 | 0.21 | Cd53 | 0.06894 | 0.20 | Cox4i2 | N/A | N/A |
| 246 | Tle6 | 0.91487 | -0.12 | Ppfia4 | 0.22172 | 0.28 | Fgfr1 | 0.47546 | 0.10 | Nuak2 | 0.27642 | -2.16 | Myo1b | 0.95833 | -0.01 |
| 247 | Ado | 0.17553 | 0.22 | Nrxn3 | 0.07712 | 0.11 | Vegfa | 0.03407 | 0.42 | Rab3il1 | 0.05469 | -1.08 | Tes | 0.92094 | 0.05 |
| 248 | Kazn | 0.02330 | -0.31 | Cacna2d3 | 0.28378 | -0.18 | Fxyd1 | 0.48770 | 0.14 | Slc5a10 | N/A | N/A | Kcnj2 | 0.17321 | -0.42 |
| 249 | Fbln7 | 0.36699 | 0.52 | Gng2 | 0.45440 | 0.10 | Dmp1 | 0.69245 | 0.24 | Tagap | 0.57347 | -0.15 | Slc38a11 | 0.14802 | -0.52 |
| 250 | S100a6 | 0.38005 | -1.10 | Vax1 | N/A | N/A | Bdnf | 0.43347 | -0.21 | Havcr2 | 0.65289 | 0.12 | Ramp2 | 0.77481 | -0.11 |
| 251 | Cobl | 0.84228 | -0.09 | Actl6b | 0.76965 | 0.05 | Lonrf3 | 0.02229 | 0.30 | Tlr1 | 0.53992 | 0.36 | Kctd12b | 0.02155 | 0.52 |
| 252 | Qdpr | 0.00424 | -1.20 | Ebf2 | 0.66428 | -0.20 | Gm216 | 0.38902 | 0.29 | Phyhd1 | 0.20044 | -0.71 | Gpr97 | N/A | N/A |
| 253 | Ctsk | 0.28253 | 0.67 | Neurod6 | 0.19872 | 0.30 | Trps1 | 0.02461 | 0.36 | Ifi27l2a | N/A | N/A | Tbxa2r | N/A | N/A |
| 254 | Capn6 | 0.37390 | 0.44 | Hecw1 | 0.22613 | 0.23 | Lrrk2 | 0.51734 | -0.14 | Liph | 0.57237 | -0.54 | Ccdc125 | 0.50687 | 0.21 |
| 255 | Susd4 | 0.97340 | -0.01 | Cntn5 | 0.38863 | 0.48 | Upp1 | 0.26694 | 0.93 | Apbb1ip | 0.66325 | 0.19 | Slc2a1 | 0.58064 | -0.14 |
| 256 | Ehd3 | 0.11676 | -0.69 | Iqsec3 | 0.64623 | 0.07 | Alpk1 | 0.43792 | -0.49 | Rnase4 | 0.64530 | -0.20 | Ets1 | 0.52951 | 0.21 |
| 257 | Rhou | 0.03666 | -0.60 | Syngr3 | 0.52709 | -0.11 | Wwc1 | 0.40942 | 0.17 | Arhgap30 | 0.57146 | 0.42 | Stc1 | 0.44836 | -0.28 |
| 258 | Cdh19 | 0.42414 | -0.35 | Fam65b | 0.64129 | -0.08 | Adrbk2 | 0.08404 | 0.20 | Rcsd1 | 0.45572 | 0.40 | Gimap5 | 0.49364 | 0.08 |
| 259 | Sytl5 | 0.17393 | -0.60 | Slc2a13 | 0.39955 | 0.13 | Ntrk3 | 0.28474 | -0.20 | Fam46c | 0.72438 | 0.18 | Casp12 | 0.91569 | 0.15 |
| 260 | Cntn4 | 0.20434 | 0.43 | Gprin3 | 0.49072 | 0.25 | Nhsl1 | 0.66630 | 0.08 | Tlr13 | 0.98389 | -0.01 | Serpina3g | 0.80369 | 0.37 |
| 261 | Pacs2 | 0.00318 | -0.60 | Mia1 | 0.00903 | 1.43 | D930015M05Rik | 0.08220 | 1.73 | Ear11 | N/A | N/A | Mgp | 0.57741 | -0.30 |
| 262 | Agpat4 | 0.15927 | -0.50 | Cdh7 | 0.92952 | 0.05 | Il17rd | 0.68972 | 0.08 | Myo18b | 0.59850 | -0.29 | Vim | 0.17440 | 0.41 |
| 263 | Dbil5 | N/A | N/A | Gpr149 | 0.83525 | -0.19 | Spry2 | 0.43399 | 0.16 | Asb10 | N/A | N/A | Hspb1 | 0.75822 | 0.20 |
| 264 | Kcnh8 | 0.30622 | 1.14 | 9430031J16Rik | 0.46522 | 0.19 | Slc1a4 | 0.50514 | 0.12 | Elf4 | 0.75055 | -0.17 | Arhgap18 | 0.92507 | -0.02 |
| 265 | Srd5a1 | 0.56008 | -0.38 | Htr2c | 0.73529 | 0.16 | 4930417G10Rik | 0.88205 | -0.04 | Dock2 | 0.02024 | -0.54 | Slc7a1 | 0.03071 | 0.33 |
| 266 | Erp27 | N/A | N/A | Cdr1 | 0.98964 | 0.01 | Trh | N/A | N/A | Spns3 | N/A | N/A | Clec2d | 0.21289 | 0.79 |
| 267 | Fbn2 | 0.04332 | 0.58 | Kcnip2 | 0.42940 | 0.19 | Mcc | 0.46137 | 0.10 | Rcan1 | 0.42854 | -0.31 | Ndufa4l2 | N/A | N/A |
| 268 | Sstr1 | 0.61628 | 0.21 | Nxph2 | 0.06978 | 1.31 | Gpc6 | 0.23919 | 0.16 | Ccl5 | N/A | N/A | Gdpd3 | 0.14022 | -3.71 |
| 269 | Lpar3 | 0.71161 | 0.23 | Spock1 | 0.68008 | -0.06 | Lgr4 | 0.59278 | 0.09 | Cd163 | 0.55668 | 0.20 | Tead4 | N/A | N/A |
| 270 | Ncald | 0.03758 | -0.19 | Gpr64 | 0.46868 | 0.51 | Capn11 | N/A | N/A | Ctsz | 0.36919 | -0.32 | Fxyd5 | 0.31423 | -0.56 |
| 271 | Dbndd2 | 0.00949 | -0.61 | Syp | 0.23341 | -0.17 | Kcnn2 | 0.31580 | 0.21 | Tmem8c | N/A | N/A | Lef1 | 0.80355 | 0.14 |
| 272 | Smoc1 | 0.16348 | -1.26 | Slc35f4 | 0.22500 | 0.34 | Plagl1 | 0.93477 | -0.03 | H2-Aa | 0.97155 | 0.06 | Slc43a3 | 0.12619 | 1.15 |
| 273 | 42617 | N/A | N/A | Epha7 | 0.71368 | -0.11 | Cyr61 | 0.75358 | 0.29 | Msh5 | 0.70146 | 0.47 | Gcnt2 | 0.86970 | -0.02 |
| 274 | Hrasls | 0.97884 | -0.01 | Tmem59l | 0.37960 | -0.26 | Tcfap2c | N/A | N/A | Rasa4 | 0.54206 | 0.07 | Foxl2os | 0.05706 | 1.11 |
| 275 | Slc22a6 | 0.28251 | -0.88 | Rab3b | 0.91917 | -0.02 | Rsph1 | 0.93095 | -0.06 | Gngt2 | 0.81605 | -0.21 | Enpep | 0.16994 | 0.91 |
| 276 | Pcdh9 | 0.59828 | -0.08 | Peli3 | 0.85436 | 0.09 | Echdc3 | N/A | N/A | Slc7a7 | 0.85103 | 0.09 | Gstm2 | 0.24410 | -0.83 |
| 277 | A930003A15Rik | 0.82863 | 0.31 | Chgb | 0.54496 | -0.09 | Gabra4 | 0.85823 | 0.02 | Cebpb | 0.76527 | -0.88 | Anxa2 | 0.22920 | 0.80 |
| 278 | Jam3 | 0.04233 | -0.63 | Igf1 | 0.80952 | 0.05 | Sorl1 | 0.88621 | -0.02 | Itgae | 0.14892 | 1.04 | Ace2 | 0.89354 | 0.07 |
| 279 | Slc6a13 | 0.21664 | -0.83 | Fmn1 | 0.67657 | 0.08 | Plscr1 | 0.74635 | 0.34 | Kcnk12 | 0.39146 | -0.27 | Net1 | 0.04267 | -0.51 |
| 280 | C430049B03Rik | 0.68409 | 0.32 | Pou6f2 | 0.68433 | -0.42 | 5033404E19Rik | N/A | N/A | Tmem173 | 0.42087 | -0.21 | 2610305D13Rik | 0.39842 | -0.73 |
| 281 | Expi | N/A | N/A | Gpr88 | 0.95413 | 0.03 | 1600014C23Rik | N/A | N/A | Lyl1 | 0.64141 | -0.26 | Nampt | 0.61819 | 0.07 |
| 282 | Synj2 | 0.01406 | -0.21 | Gprin1 | 0.31416 | -0.21 | Proca1 | 0.91556 | 0.05 | Clec4a3 | 0.77050 | 0.19 | Pear1 | 0.17337 | -0.68 |
| 283 | Myt1 | 0.47997 | 0.19 | Palm3 | 0.23097 | -0.31 | Ddit4l | 0.69615 | 0.18 | Cd209g | 0.58200 | -0.78 | Tiam1 | 0.05770 | -0.27 |
| 284 | Ankrd43 | N/A | N/A | Snap25 | 0.58331 | -0.12 | Pcsk9 | 0.33833 | -0.37 | Itgax | 0.90394 | -0.13 | Slc16a9 | 0.54071 | 0.26 |
| 285 | Col3a1 | 0.61272 | 0.33 | Stac | 0.98710 | -0.01 | Eepd1 | 0.77307 | -0.06 | Gpr77 | 0.99823 | 0.00 | 2010110P09Rik | N/A | N/A |
| 286 | Vcan | 0.09879 | -0.64 | Syt7 | 0.48174 | -0.07 | Tnfaip8 | 0.20620 | 0.58 | S100a9 | 0.15817 | -1.67 | Cd97 | 0.78913 | 0.05 |
| 287 | E2f8 | 0.89345 | 0.10 | Asphd1 | 0.48618 | 0.24 | Lrtm2 | 0.43250 | -0.35 | Adcy7 | 0.95170 | -0.02 | Gimap6 | 0.46783 | -0.08 |
| 288 | Kcnk1 | 0.62929 | -0.11 | Lin28b | 0.42811 | 0.40 | Sparcl1 | 0.06904 | -0.24 | Cst3 | 0.35625 | -0.38 | Olfr1372-ps1 | 0.21285 | 0.68 |
| 289 | Faah | 0.61819 | -0.12 | Ipw | 0.02123 | 0.69 | 4932443I19Rik | 0.67122 | -1.01 | Cd84 | 0.40086 | 0.29 | F2rl3 | N/A | N/A |
| 290 | E130309F12Rik | 0.61371 | 0.11 | Tcp11 | 0.46583 | -1.11 | Lgi4 | 0.94852 | 0.02 | Rps6ka1 | 0.42951 | -0.44 | Rbpms | 0.97254 | -0.02 |
| 291 | Trak2 | 0.83068 | -0.02 | Tuft1 | 0.22146 | -0.31 | Enkur | 0.78121 | 0.29 | Tnfrsf11a | 0.14726 | 0.52 | Akap12 | 0.81554 | 0.06 |
| 292 | Nkain2 | 0.54185 | -0.07 | BC089491 | N/A | N/A | Cml5 | 0.87057 | -0.08 | Hspb3 | N/A | N/A | Adora2a | N/A | N/A |
| 293 | Pcsk6 | 0.07852 | -0.81 | Aff2 | 0.04246 | -0.45 | Tgfb2 | 0.99625 | 0.00 | Plek | 0.17628 | 0.40 | Xaf1 | 0.30699 | -0.20 |
| 294 | Efnb3 | 0.12613 | -0.44 | Rab3c | 0.50498 | 0.12 | Hhipl1 | 0.05955 | -1.18 | Gpr132 | N/A | N/A | Thbd | 0.25009 | -0.26 |
| 295 | AI848285 | N/A | N/A | C030023E24Rik | 0.00924 | 1.07 | Il33 | 0.02257 | -0.84 | Sla | 0.59449 | 0.12 | Unc45b | N/A | N/A |
| 296 | Ly6g6f | N/A | N/A | Aox4 | 0.52272 | -0.55 | Tulp3 | 0.59321 | 0.06 | Egr2 | 0.85953 | 0.13 | Csf3 | N/A | N/A |
| 297 | Slc22a3 | 0.35775 | 1.11 | Tekt2 | N/A | N/A | Dclk1 | 0.55888 | 0.07 | Abhd15 | 0.85956 | -0.12 | Vil1 | N/A | N/A |
| 298 | Serinc5 | 0.04950 | -0.56 | D130043K22Rik | 0.46141 | 0.14 | Tmprss7 | 0.05101 | 0.95 | S100a8 | 0.62108 | 0.29 | Tpm4 | 0.78318 | -0.03 |
| 299 | Dll1 | 0.28761 | 0.76 | Kcnt1 | 0.90544 | 0.04 | Col4a5 | 0.27519 | -0.21 | Rapsn | N/A | N/A | Serpinh1 | 0.75008 | 0.17 |
| 300 | Slc12a2 | 0.12784 | -0.41 | Chrnb2 | 0.93524 | -0.02 | Kctd14 | 0.90813 | 0.07 | Lsp1 | 0.29135 | 0.78 | Rph3al | N/A | N/A |
| 301 | Sftpc | N/A | N/A | Mal2 | 0.38907 | 0.17 | Papss2 | 0.23874 | -0.30 | Naip2 | 0.45068 | 0.26 | Psors1c2 | N/A | N/A |
| 302 | Bcat1 | 0.31968 | -0.16 | Nsg2 | 0.92809 | -0.01 | Snora28 | N/A | N/A | AB124611 | 0.69513 | 0.18 | Fbln5 | 0.95420 | 0.05 |
| 303 | Golga7 | 0.22290 | -0.12 | Slc5a7 | 0.87879 | 0.14 | Hs3st3b1 | 0.60266 | -0.20 | LOC547349 | N/A | N/A | 4930486L24Rik | N/A | N/A |
| 304 | Cela1 | N/A | N/A | Syt5 | 0.04391 | -0.31 | Dnaic1 | 0.69741 | 0.22 | Cd209b | 0.86842 | 0.16 | Tcf7 | 0.96323 | -0.01 |
| 305 | Micall1 | 0.01561 | -0.35 | E130003G02Rik | 0.54068 | -0.32 | Rgs7 | 0.71947 | -0.05 | Fam110a | 0.71566 | 0.30 | Smtn | 0.76383 | -0.19 |
| 306 | Frmd5 | 0.13147 | -0.70 | Cntnap5a | 0.66581 | -0.11 | Pou3f2 | 0.45620 | 0.23 | Gal3st4 | 0.85590 | -0.05 | Pla1a | 0.63590 | -0.49 |
| 307 | Ablim2 | 0.10581 | -0.27 | 1500009L16Rik | 0.62200 | -0.19 | Gldc | 0.99642 | 0.00 | A630001G21Rik | 0.41953 | -0.45 | Cd109 | 0.04011 | 0.67 |
| 308 | Abca2 | 0.10857 | -0.45 | Ctxn2 | 0.68763 | 0.11 | P4ha2 | 0.99432 | 0.00 | Lilrb4 | 0.19984 | 1.10 | Casq2 | 0.23181 | 1.33 |
| 309 | Abtb2 | 0.44335 | -0.29 | A930011O12Rik | 0.39844 | 0.24 | Chst1 | 0.96168 | 0.01 | Lrrc33 | 0.29833 | -0.37 | Ifltd1 | 0.69945 | 0.43 |
| 310 | Olig2 | 0.07480 | -0.91 | Cntnap2 | 0.44893 | 0.09 | Hyal1 | 0.60051 | 0.20 | F13a1 | 0.52076 | -0.38 | Bmx | 0.43750 | -0.56 |
| 311 | Irx1 | N/A | N/A | Itgbl1 | 0.22047 | 0.50 | Olfml2a | 0.81254 | -0.89 | Ptgs1 | 0.30025 | -0.30 | Sp100 | 0.73088 | 0.28 |
| 312 | 2610035D17Rik | 0.05492 | -0.71 | 5730522E02Rik | 0.43893 | 0.33 | Dlk1 | 0.59086 | -0.33 | Lair1 | 0.44473 | -0.18 | Cnn2 | 0.69758 | 0.28 |
| 313 | Ust | 0.42804 | -0.16 | Clvs1 | 0.99316 | 0.00 | Boc | 0.20541 | 0.44 | Kcna7 | N/A | N/A | Gpr4 | 0.69969 | -0.17 |
| 314 | Srpk3 | 0.24044 | -0.70 | Zdbf2 | 0.38397 | 0.20 | Rasl11a | 0.98211 | -0.01 | Galnt12 | 0.29515 | -0.84 | Srgn | 0.92377 | 0.02 |
| 315 | BC057022 | 0.13258 | -1.00 | Lefty2 | 0.22014 | -0.47 | Sycp2 | 0.61227 | 0.23 | Trpv2 | 0.65427 | 0.14 | Plk2 | 0.63414 | -0.09 |
| 316 | B3gnt7 | 0.78298 | 0.35 | Cdkl2 | 0.59538 | 0.12 | Sox1 | 0.41243 | 0.34 | Cass4 | 0.57979 | 0.12 | Slc40a1 | 0.11764 | -0.41 |
| 317 | Lnx1 | 0.91616 | 0.02 | Dcx | 0.51465 | 0.23 | Ncrna00085 | 0.48713 | -0.19 | Arhgdib | 0.79770 | 0.14 | Des | 0.48000 | -0.11 |
| 318 | St18 | 0.89305 | 0.04 | Mmp24 | 0.86825 | -0.05 | 4933409K07Rik | 0.27413 | 0.14 | Npl | 0.96709 | 0.02 | Tnfaip8l1 | 0.70256 | -0.32 |
| 319 | Fam89a | 0.55565 | -0.90 | Fat3 | 0.81466 | -0.03 | Cd38 | 0.19046 | -0.14 | Pik3cd | 0.79006 | -0.09 | Pmaip1 | 0.34244 | 0.96 |
| 320 | Mtap7 | 0.27060 | -0.40 | Caln1 | 0.79838 | 0.08 | Echdc2 | 0.80577 | 0.19 | Gm885 | 0.54396 | 0.29 | Il27ra | 0.86891 | 0.80 |
| 321 | Gpt2 | 0.73853 | -0.08 | Adamts15 | 0.72637 | 0.20 | Ntsr2 | 0.28438 | -0.29 | Gpsm3 | N/A | N/A | Sema7a | 0.32109 | -0.20 |
| 322 | Csmd3 | 0.23645 | 0.24 | 2610109H07Rik | 0.83764 | 0.09 | Ddr2 | 0.76950 | -0.14 | Myl2 | N/A | N/A | Gm6639 | 0.66613 | -0.02 |
| 323 | 42437 | N/A | N/A | H2-M5 | N/A | N/A | Sfrp1 | 0.54500 | -0.19 | Mafb | 0.44435 | -0.29 | Paqr5 | 0.37701 | -0.22 |
| 324 | Tmem163 | 0.28434 | -0.40 | Rnf152 | 0.20258 | 0.35 | 3830431G21Rik | 0.56492 | 0.52 | Camp | N/A | N/A | Mall | 0.26826 | -1.10 |
| 325 | Klhl2 | 0.22041 | 0.14 | Nrip3 | 0.16474 | 0.19 | Pde9a | 0.92802 | 0.04 | Trim14 | N/A | N/A | Msrb3 | 0.25376 | 0.45 |
| 326 | Ccdc13 | 0.99635 | 0.58 | Trfr2 | 0.56340 | -0.41 | Glb1l | 0.47865 | -0.31 | Nfkbie | 0.34197 | -0.45 | Ephb4 | 0.87244 | -0.07 |
| 327 | 4831426I19Rik | 0.25222 | -0.60 | Zmat4 | 0.53864 | -0.12 | Scg3 | 0.72934 | -0.03 | Plcg2 | 0.11436 | -0.47 | Ripply3 | 0.36399 | -0.14 |
| 328 | Dbc1 | 0.46523 | -0.27 | Tmem91 | 0.82924 | -0.11 | Gm17660 | N/A | N/A | Fmnl1 | 0.79118 | -0.04 | Fli1 | 0.54659 | 0.18 |
| 329 | Dock10 | 0.18040 | -0.42 | Vstm2a | 0.11140 | -0.07 | Wnt7a | 0.14739 | -0.43 | Gm11428 | 0.59855 | -0.75 | Eng | 0.07855 | 1.29 |
| 330 | Fam122b | 0.35106 | -0.42 | Disp2 | 0.44264 | -0.08 | Cmya5 | 0.30592 | -0.37 | I830077J02Rik | 0.19590 | -0.59 | Smad6 | 0.76229 | 0.42 |
| 331 | Fah | 0.25439 | -0.41 | Npy2r | 0.55809 | -0.13 | Axl | 0.31813 | -0.14 | Ier5 | 0.72039 | 0.14 | Art3 | 0.22086 | -0.72 |
| 332 | 4932441J04Rik | N/A | N/A | Htr1d | 0.63381 | 0.90 | Mmp14 | 0.72493 | -0.12 | Emp3 | 0.53148 | -0.01 | Heg1 | 0.99148 | 0.00 |
| 333 | Slc24a4 | 0.99467 | 0.00 | Nptxr | 0.42486 | 0.72 | Tnfrsf19 | 0.40636 | 0.13 | Gpr34 | 0.37834 | 0.33 | Osmr | 0.55554 | 0.32 |
| 334 | Adi1 | 0.95027 | 0.02 | Spint2 | 0.35341 | -0.44 | Dgkb | 0.39401 | 0.12 | Mrc1 | 0.69916 | -0.12 | Gbp4 | 0.86717 | 0.13 |
| 335 | Zdhhc14 | 0.19449 | -0.35 | Prmt8 | 0.34071 | -0.35 | Acss1 | 0.18153 | -0.27 | Hk2 | 0.55064 | -0.24 | Slc39a10 | 0.34646 | 0.14 |
| 336 | Lect1 | 0.29029 | 0.52 | Grin2d | 0.07376 | -0.93 | Aspg | 0.93790 | 0.68 | Gm11545 | N/A | N/A | Serpina1b | 0.49497 | 0.59 |
| 337 | Ick | 0.19894 | -0.28 | AW555464 | 0.28131 | -0.17 | Tekt5 | 0.51420 | -0.44 | Pilra | 0.66880 | -0.13 | Shroom4 | 0.98038 | 0.01 |
| 338 | Unc5c | 0.40213 | 0.07 | Prrt2 | 0.26637 | -0.25 | Als2cl | 0.57429 | 0.15 | Lbx1 | N/A | N/A | Ifitm3 | 0.23485 | 0.41 |
| 339 | Hr | 0.02285 | -0.95 | 9030425E11Rik | 0.16167 | -0.41 | Notch2 | 0.22127 | 0.18 | Dok1 | 0.60859 | -0.66 | Magix | N/A | N/A |
| 340 | Chrne | N/A | N/A | Efna5 | 0.49959 | 0.16 | P2rx6 | 0.47522 | -0.05 | Rrad | N/A | N/A | Wwtr1 | 0.01461 | 0.49 |
| 341 | 2010317E24Rik | 0.33443 | 0.93 | 2410137F16Rik | 0.29109 | 0.59 | Znrf3 | 0.73068 | 0.05 | Gpr35 | 0.71547 | 0.18 | Gimap1 | 0.84084 | 0.06 |
| 342 | Bglap | N/A | N/A | Ankrd55 | 0.00306 | 0.35 | Id3 | 0.42620 | -0.40 | Mmp9 | 0.61226 | -0.30 | BC006779 | 0.47629 | 0.40 |
| 343 | Cadm4 | 0.22217 | -0.33 | Ngfr | 0.68996 | 0.17 | Hey2 | 0.41135 | 0.35 | Gpr114 | N/A | N/A | Hic1 | 0.59969 | 0.40 |
| 344 | B230206H07Rik | 0.91376 | 0.44 | Slc6a17 | 0.56047 | 0.07 | Sned1 | 0.38811 | -0.41 | Phf15 | 0.03429 | -0.34 | Tfpi | 0.48158 | -0.27 |
| 345 | En2 | 0.81520 | 0.16 | Pcdha5 | 0.99011 | 0.00 | Ccdc121 | 0.21048 | 1.12 | Cdh23 | 0.48473 | -0.47 | Endou | 0.66087 | -0.99 |
| 346 | Cntn6 | 0.67233 | 0.22 | D3Bwg0562e | 0.76059 | 0.03 | Gm11128 | 0.64912 | -0.24 | Grn | 0.75862 | -0.08 | Ehd2 | 0.50009 | -0.40 |
| 347 | Rbm11 | 0.61112 | -0.17 | Odz4 | 0.45734 | 0.09 | Snora2b | N/A | N/A | Il1rn | 0.43654 | 0.44 | Tmem88 | 0.20465 | -0.46 |
| 348 | Chst3 | 0.64887 | 0.09 | Pkib | 0.89977 | 0.03 | Baalc | 0.48960 | -0.12 | Tgm2 | 0.61668 | 0.31 | Gbp9 | 0.03051 | 0.92 |
| 349 | Dcaf12l1 | 0.31625 | 0.31 | Rspo3 | 0.81657 | 0.03 | Ephb3 | 0.12414 | -0.43 | Lat2 | 0.79411 | 0.27 | Galntl2 | 0.52568 | -0.78 |
| 350 | Chst8 | 0.14586 | -0.48 | Odz2 | 0.88587 | 0.01 | Dhtkd1 | 0.28146 | 0.60 | Efhd2 | 0.72707 | -0.03 | Ltbp4 | 0.67521 | 0.10 |
| 351 | Rap2a | 0.89356 | 0.02 | Vip | 0.82279 | 0.10 | Lix1 | 0.07156 | 0.18 | Ptpn18 | 0.99263 | 0.60 | Apln | 0.44625 | -0.12 |
| 352 | Matn2 | 0.93556 | 0.01 | Tnfaip8l3 | 0.84441 | 0.04 | Ddhd1 | 0.87299 | -0.02 | Klrd1 | N/A | N/A | Cysltr2 | 0.99948 | 0.59 |
| 353 | Pla2g4a | 0.68240 | 0.15 | Angpt1 | 0.27229 | 0.41 | Rgma | 0.62307 | -0.12 | Cxcr3 | N/A | N/A | Mlkl | N/A | N/A |
| 354 | Hist1h4h | N/A | N/A | Kcnh1 | 0.35887 | -0.17 | S1pr1 | 0.66581 | 0.10 | Tgfb1 | 0.04308 | 1.02 | Pkn3 | N/A | N/A |
| 355 | Secisbp2l | 0.32372 | -0.17 | BC030500 | 0.89049 | -0.05 | Wdr52 | 0.06367 | 0.62 | Tnfrsf13b | N/A | N/A | Crem | 0.40065 | 0.24 |
| 356 | Slitrk1 | 0.57391 | 0.06 | Peg3 | 0.33373 | -0.11 | Odz3 | 0.40037 | 0.18 | Fyb | 0.30299 | 0.57 | Irx3 | N/A | N/A |
| 357 | Larp6 | 0.87455 | 0.06 | Aloxe3 | 0.23275 | -0.77 | Sp6 | 0.04233 | 1.22 | Prg2 | N/A | N/A | Smoc2 | 0.24075 | 0.34 |
| 358 | Arsg | 0.15378 | -0.87 | Unc5a | 0.33503 | -0.18 | Fam198a | 0.53775 | 0.25 | Fes | 0.65531 | -0.01 | Abcg2 | 0.76187 | 0.05 |
| 359 | Wscd1 | 0.00533 | -0.46 | Cacna1a | 0.94366 | 0.01 | Grm5 | 0.03968 | 0.41 | Adap2 | 0.09625 | -0.85 | Nid2 | 0.06892 | 0.87 |
| 360 | Mc4r | 0.35499 | 0.46 | Pla2g4e | 0.01884 | 1.83 | Gm11992 | 0.33883 | 0.92 | Daglb | 0.45031 | -0.27 | Gstt2 | 0.51284 | 0.31 |
| 361 | Epn2 | 0.79650 | -0.02 | Rit2 | 0.00044 | -0.78 | Thbs4 | 0.23023 | -0.61 | Myadml2 | 0.62033 | -0.42 | Prkch | 0.47542 | 0.73 |
| 362 | Caskin2 | 0.35294 | -0.29 | Prdm8 | 0.26876 | -0.48 | Wdr69 | N/A | N/A | Bcl3 | N/A | N/A | Gbp2 | 0.86058 | 0.16 |
| 363 | B3galt5 | 0.65843 | -0.06 | Chd5 | 0.28990 | 0.14 | 2810030E01Rik | 0.17408 | 0.31 | Ly9 | N/A | N/A | Sectm1a | N/A | N/A |
| 364 | Etnk2 | N/A | N/A | Gpr135 | 0.63885 | -0.24 | Adamts6 | 0.86875 | -0.04 | Sult1a1 | 0.74229 | -0.20 | Abca4 | 0.54833 | -0.35 |
| 365 | Me3 | 0.90301 | -0.02 | AI606473 | N/A | N/A | C2cd4b | 0.54046 | -0.03 | Sp110 | 0.79990 | -0.13 | Grb10 | 0.66307 | -0.12 |
| 366 | Dlk2 | 0.92278 | -0.05 | Nanos1 | 0.34469 | 0.15 | Hectd2 | 0.57805 | 0.09 | C130050O18Rik | 0.69030 | 1.23 | Serpinb9 | 0.42917 | -0.27 |
| 367 | Tmem132b | 0.28850 | -0.08 | Satb2 | 0.68260 | 0.20 | Pdyn | 0.40440 | -0.41 | P2ry12 | 0.68723 | -0.08 | Iqcg | 0.43261 | 0.15 |
| 368 | Tmcc2 | 0.87515 | 0.03 | Rgag1 | 0.92784 | -0.06 | Ston2 | 0.70948 | 0.07 | Gsg1 | 0.60807 | 0.09 | Slc7a5 | 0.27213 | 0.19 |
| 369 | Car14 | 0.27712 | -0.65 | Trpc4 | 0.15754 | 0.26 | Evc | 0.30351 | -0.74 | 1700017B05Rik | 0.17758 | 0.31 | Gm8817 | 0.32713 | 1.18 |
| 370 | Gss | 0.44417 | -0.24 | Gpr151 | 0.77850 | -0.13 | Tom1l1 | 0.95595 | 0.01 | Rnase10 | 0.47018 | 0.85 | Rasd1 | 0.77464 | -0.15 |
| 371 | Rap1gap | 0.13935 | -0.35 | Slc12a5 | 0.23311 | -0.10 | Sp5 | N/A | N/A | Cd79b | N/A | N/A | Sdcbp2 | 0.19339 | 0.64 |
| 372 | Brca1 | 0.30413 | 0.56 | Mllt11 | 0.39520 | -0.10 | Nr4a2 | 0.45439 | 0.28 | Rgs14 | 0.42331 | -0.23 | Cldn6 | N/A | N/A |
| 373 | Ptgds | 0.09758 | -1.12 | Napb | 0.76042 | 0.03 | Ndrg2 | 0.05548 | -0.52 | Cmklr1 | 0.81797 | 0.18 | Hsf4 | 0.29538 | -0.71 |
| 374 | Cdo1 | 0.32526 | -0.33 | Cygb | 0.94458 | -0.02 | Timp3 | 0.97618 | 0.01 | Ucp2 | 0.30847 | 0.13 | Cmtm8 | 0.24409 | -0.85 |
| 375 | Fez1 | 0.16453 | -0.27 | Grin1 | 0.30687 | -0.23 | Aldoc | 0.14624 | -0.32 | Ptk2b | 0.22506 | -0.36 | Htra3 | 0.93170 | -0.06 |
| 376 | Ptprd | 0.53313 | -0.11 | Gnrh1 | N/A | N/A | A430105I19Rik | 0.37106 | 0.18 | Gsdmd | 0.81262 | -0.26 | Fam115c | 0.08636 | 1.52 |
| 377 | Cyp3a13 | 0.02480 | -0.66 | Calb1 | 0.31564 | -0.15 | Nr2e1 | 0.40326 | 0.17 | Igsf6 | 0.13896 | -0.46 | 42614 | N/A | N/A |
| 378 | Fam83d | 0.19879 | -1.43 | Scn9a | 0.90391 | -0.03 | Fgf1 | 0.08422 | -0.48 | Itpripl1 | 0.31185 | 0.27 | Lrrc55 | 0.56770 | -0.28 |
| 379 | Apol11b | 0.92419 | 0.72 | Gm5741 | N/A | N/A | Gm2061 | 0.62021 | 0.17 | Man2b1 | 0.22850 | -0.32 | Pomc | N/A | N/A |
| 380 | Pla2g16 | 0.01023 | -0.67 | Elmod1 | 0.86617 | 0.04 | Hif3a | 0.50466 | -0.29 | Siglec1 | 0.69654 | -0.24 | Ces2e | 0.57307 | 1.19 |
| 381 | Lass2 | 0.12992 | -0.94 | Nxnl2 | N/A | N/A | Rarres1 | N/A | N/A | Ppp1r3b | 0.97577 | -0.02 | Abcc4 | 0.09213 | 0.54 |
| 382 | Gas7 | 0.06794 | -0.10 | Syn2 | 0.64137 | 0.03 | Ptar1 | 0.27360 | 0.28 | Ccl22 | 0.65801 | 0.70 | Capg | N/A | N/A |
| 383 | Dnahc10 | 0.28837 | -0.52 | N28178 | 0.98706 | 0.00 | Mfap3l | 0.56919 | -0.19 | Ltf | N/A | N/A | Atp10d | 0.55872 | 0.41 |
| 384 | Omp | 0.68950 | 1.04 | A530058N18Rik | 0.43143 | -0.29 | Gulp1 | 0.41351 | 0.42 | Ccdc162 | 0.34050 | 0.51 | Gm13157 | 0.64052 | -0.21 |
| 385 | Fbxo32 | 0.16880 | -0.42 | Mast1 | 0.76159 | 0.03 | Ccdc67 | 0.81247 | -0.07 | Sphk1 | 0.56656 | -0.31 | Tmem71 | 0.67236 | 0.17 |
| 386 | Fyn | 0.13140 | -0.21 | Grid2ip | 0.28452 | 1.25 | Prss35 | 0.26514 | 0.30 | Lgmn | 0.29919 | -0.22 | Pde5a | 0.24379 | 0.16 |
| 387 | Grik3 | 0.40351 | -0.06 | Runx1t1 | 0.97091 | -0.01 | Pdpn | 0.92493 | -0.04 | Tcirg1 | 0.29567 | -0.58 | Tpd52l1 | 0.68651 | -0.12 |
| 388 | Ttll7 | 0.65004 | 0.09 | Pcdha6 | 0.64884 | 0.18 | Ppara | 0.36673 | -0.17 | Il7r | 0.20003 | 0.88 | AW112010 | 0.46733 | 1.11 |
| 389 | Prickle1 | 0.56333 | -0.14 | Fgf9 | 0.80554 | 0.04 | Slc2a4 | 0.12891 | 0.40 | 1700003F12Rik | N/A | N/A | Notch4 | 0.43069 | -0.40 |
| 390 | Tspan17 | 0.70169 | 0.07 | Hcn3 | 0.74808 | 0.12 | Gas1 | 0.52768 | 0.24 | Folr2 | N/A | N/A | Fzd4 | 0.31550 | 0.33 |
| 391 | Pkd2l1 | 0.90343 | 0.15 | Rbfox3 | 0.21277 | -0.28 | Malat1 | 0.27207 | 0.24 | Zfp36 | 0.16183 | -0.50 | Bok | 0.70763 | -0.14 |
| 392 | Fign | 0.57975 | -0.29 | D10Bwg1379e | 0.94548 | -0.01 | Clu | 0.01737 | -0.43 | Ctse | N/A | N/A | Dlc1 | 0.17208 | 0.15 |
| 393 | Prr5l | 0.00147 | -0.59 | Mtus2 | 0.65971 | -0.07 | Rasgrp1 | 0.80447 | -0.07 | Renbp | 0.65168 | -0.15 | Spock2 | 0.95178 | 0.01 |
| 394 | Dhcr24 | 0.19216 | -0.11 | Rgs11 | 0.74624 | 0.11 | Rhcg | N/A | N/A | Sykb | N/A | N/A | Slco1c1 | 0.11758 | 0.55 |
| 395 | B3gat2 | 0.57697 | -0.23 | Slc6a15 | 0.89775 | 0.02 | Gpr156 | 0.76732 | -0.14 | Arl5c | 0.85267 | -0.40 | Myl4 | N/A | N/A |
| 396 | Fam196b | 0.33866 | 0.24 | Pik3c2g | 0.98610 | -0.60 | Sfrs18 | 0.29506 | 0.25 | Plac8 | N/A | N/A | Pla2g2f | 0.27033 | 1.61 |
| 397 | Amd1 | 0.53802 | 0.08 | Unc5d | 0.77329 | -0.13 | Adcyap1r1 | 0.55798 | 0.08 | Bank1 | 0.00793 | -0.85 | Sgms1 | 0.63404 | 0.09 |
| 398 | Ddx43 | 0.99995 | -0.58 | Pcdha3 | 0.17730 | -0.72 | Per3 | 0.99534 | 0.00 | Ccl8 | N/A | N/A | Prkd2 | 0.20653 | 0.59 |
| 399 | Chn2 | 0.19233 | -0.58 | Sertad4 | 0.26371 | 0.37 | Pln | 0.03272 | 0.74 | Il27 | N/A | N/A | Usp43 | 0.05290 | 1.21 |
| 400 | Dnaic2 | 0.67559 | 0.16 | Cntnap5c | 0.20391 | 0.20 | Plxnb1 | 0.05735 | -0.38 | Cxcl2 | N/A | N/A | Tecrl | 0.20636 | 0.83 |
| 401 | Pcdhb10 | 0.99942 | 0.00 | Ly6h | 0.64243 | -0.29 | Car8 | 0.90945 | -0.06 | Rassf5 | 0.58432 | 0.12 | Gm14005 | 0.87985 | -0.05 |
| 402 | Trim59 | 0.82263 | -0.09 | Nanos2 | 0.41194 | 1.05 | Glycam1 | 0.20951 | 0.46 | Apobec2 | 0.62527 | 0.65 | Aldh1a7 | 0.91096 | 0.05 |
| 403 | Prkcz | 0.11511 | -0.16 | Slc7a14 | 0.27789 | -0.09 | Bai3 | 0.10180 | 0.24 | Tmem106a | 0.13889 | 0.52 | Bcam | 0.18282 | -1.05 |
| 404 | 42621 | N/A | N/A | 2410066E13Rik | 0.41344 | 0.31 | Epb4.1l5 | 0.25624 | 0.48 | A830007P12Rik | 0.63180 | 0.14 | Nrp1 | 0.29786 | 0.27 |
| 405 | Mmp15 | 0.63084 | -0.11 | Crabp2 | N/A | N/A | Pbxip1 | 0.91260 | 0.02 | Slc16a10 | 0.81009 | 0.08 | Gm6614 | 0.91468 | 0.13 |
| 406 | Adamtsl4 | 0.09840 | -1.41 | Arx | 0.30608 | 0.43 | Bdkrb2 | N/A | N/A | Plekho2 | 0.41898 | 0.23 | Ptges | 0.95727 | 0.02 |
| 407 | Pdzrn4 | 0.46573 | -0.44 | Grm1 | 0.16846 | 0.22 | Gpr179 | 0.11841 | 1.02 | Rhbdf2 | N/A | N/A | Crispld1 | 0.66159 | 0.14 |
| 408 | Col1a1 | 0.98933 | -0.01 | Cort | 0.80033 | -0.87 | Gm9766 | 0.82573 | -0.05 | Fcgr4 | N/A | N/A | Ifi44 | 0.87063 | -0.09 |
| 409 | Fam131b | 0.17050 | -0.24 | Zdhhc22 | 0.55364 | -0.49 | Fos | 0.89622 | -0.09 | H2-Q1 | 0.98547 | -0.02 | Clic6 | 0.41020 | 2.18 |
| 410 | Tmem20 | 0.57309 | -0.20 | Cntnap3 | 0.93898 | 0.03 | Irs2 | 0.90393 | -0.02 | Epsti1 | 0.87405 | -0.08 | Mpp7 | 0.52342 | 0.22 |
| 411 | Emid1 | 0.05342 | -1.18 | Nap1l2 | 0.18258 | 0.31 | Drp2 | 0.63464 | 0.03 | H2-Q2 | N/A | N/A | Sgms2 | 0.07626 | 0.53 |
| 412 | Nipa1 | 0.29931 | -0.16 | Cck | 0.32415 | -0.21 | Pard3b | 0.85538 | -0.06 | Sh3bp1 | 0.17802 | -0.63 | Casp6 | 0.42296 | -0.47 |
| 413 | BC048355 | 0.56368 | 0.12 | Pcp4 | 0.28320 | -0.22 | Tmem229a | 0.28501 | -0.14 | Naip5 | 0.58771 | 0.17 | Hspg2 | 0.31713 | 0.55 |
| 414 | Slc48a1 | 0.20422 | -0.27 | E130309D14Rik | 0.39304 | -0.20 | Pax4 | N/A | N/A | Arhgap25 | 0.54064 | 0.44 | Cd300lg | 0.61314 | 0.34 |
| 415 | Grik4 | 0.54440 | 0.14 | Gpr21 | 0.22503 | 0.33 | Evc2 | 0.16445 | 0.38 | Il4ra | 0.04537 | 1.43 | Rasgrp3 | 0.01964 | -0.43 |
| 416 | Adam9 | 0.11200 | -0.23 | Ccdc148 | 0.60835 | -0.14 | Rnf215 | 0.31227 | -0.30 | Spp1 | 0.49029 | -0.30 | Cd151 | 0.44533 | -0.35 |
| 417 | Rasl12 | 0.32763 | 0.28 | 6330439K17Rik | 0.70695 | 0.07 | Gm10560 | N/A | N/A | Tcfec | N/A | N/A | Fam176b | N/A | N/A |
| 418 | Ctnna3 | 0.44756 | -0.63 | Scn3b | 0.71839 | 0.05 | Pdgfrb | 0.89281 | 0.02 | Tspan32 | 0.09313 | 1.02 | Galntl4 | 0.69722 | 0.05 |
| 419 | Acy3 | 0.79658 | -0.11 | Pth2r | 0.01704 | 2.14 | Ndp | 0.88291 | -0.07 | Entpd1 | 0.13323 | 0.23 | Lepr | 0.78619 | 0.07 |
| 420 | Apod | 0.05234 | -0.50 | Rbms3 | 0.81471 | 0.07 | Cml3 | 0.84903 | 0.09 | Hfe | 0.49226 | 0.45 | Vtn | 0.18794 | -0.50 |
| 421 | 1190007F08Rik | 0.73187 | 0.13 | 1600029O15Rik | 0.08880 | 0.59 | Exd1 | 0.02362 | 2.09 | Fcrl1 | 0.95171 | 0.07 | Tcea3 | N/A | N/A |
| 422 | Dpp6 | 0.13067 | -0.13 | 9130024F11Rik | 0.21138 | 0.58 | Smyd1 | 0.93369 | -0.07 | Gcnt1 | 0.36897 | 0.30 | Gjc1 | 0.65291 | -0.18 |
| 423 | Fam102a | 0.07767 | -0.25 | Vwc2l | 0.41902 | 0.39 | Npas2 | 0.53679 | -0.13 | Fhod1 | 0.80850 | 0.12 | Lalba | N/A | N/A |
| 424 | Gng13 | 0.29438 | -0.58 | Ccl27b | 0.79812 | -0.06 | Prodh | 0.65909 | -0.21 | 1700110I01Rik | 0.63386 | 0.17 | Nes | 0.13343 | 0.54 |
| 425 | Sntg1 | 0.54886 | 0.11 | Cnksr2 | 0.98432 | 0.00 | Cyp7b1 | 0.36428 | 0.19 | Dnase1l3 | 0.57327 | 0.45 | A3galt2 | 0.82045 | 0.30 |
| 426 | Gfra1 | 0.65658 | 0.13 | Vash2 | 0.74725 | 0.13 | Npas3 | 0.28430 | 0.39 | 4833422F24Rik | N/A | N/A | Oas1c | 0.67504 | -0.21 |
| 427 | Has2as | N/A | N/A | Islr | 0.83836 | -0.14 | Mtl5 | 0.07743 | -1.02 | Ifi30 | 0.90677 | -0.11 | Ablim1 | 0.76540 | -0.05 |
| 428 | Nfe2l3 | 0.26955 | 0.27 | Cacng5 | 0.91335 | -0.05 | Fam55d | 0.36157 | 0.33 | Abca9 | 0.62058 | -0.08 | St8sia6 | 0.68537 | -0.18 |
| 429 | Dpy19l1 | 0.43646 | -0.12 | B4galnt4 | 0.77923 | 0.08 | Myh6 | 0.97373 | 0.02 | Hexa | 0.81873 | 0.07 | Tmsb10 | 0.74976 | -0.09 |
| 430 | Npsr1 | 0.01590 | 0.87 | Uchl1 | 0.60033 | -0.17 | Fgd4 | 0.00661 | 0.41 | 5430427O19Rik | 0.46674 | -0.39 | Syt15 | 0.61682 | 0.14 |
| 431 | Itih2 | 0.19366 | -0.40 | Sgsm1 | 0.82613 | -0.03 | Npff | 0.79952 | -0.87 | Stat6 | 0.62191 | 0.17 | Bambi | 0.62809 | 0.26 |
| 432 | Metrn | 0.40087 | 0.27 | Map3k15 | 0.98621 | -0.01 | Efna4 | N/A | N/A | 4930404N11Rik | 0.60334 | 0.02 | Sele | N/A | N/A |
| 433 | Fam163a | 0.33365 | -0.26 | Ankrd45 | 0.78664 | -0.04 | Lxn | 0.83622 | 0.06 | Pdcd1 | N/A | N/A | Ret | 0.95368 | 0.03 |
| 434 | Bglap2 | N/A | N/A | Serpini1 | 0.10189 | 0.26 | Appl2 | 0.69409 | 0.05 | Psmb8 | 0.22469 | 1.89 | Pcdhgb8 | 0.24156 | -0.52 |
| 435 | Aldh1l2 | 0.47331 | 0.23 | Trpv6 | 0.50763 | -0.46 | Ak4 | 0.85372 | -0.02 | Tgfbi | 0.87839 | -0.06 | Fam71a | N/A | N/A |
| 436 | Tmem179 | 0.58361 | -0.14 | Nnmt | 0.99116 | -0.01 | Calr4 | 0.89915 | -0.09 | Gm4980 | 0.18569 | 0.38 | Zfp69 | 0.46224 | -0.70 |
| 437 | Traf4 | 0.65536 | -0.21 | Rgmb | 0.92064 | 0.03 | Camk2g | 0.45092 | -0.05 | Fgr | 0.34218 | 1.28 | Angptl4 | 0.15824 | -0.84 |
| 438 | Kcnmb4 | 0.88711 | 0.05 | 4930539E08Rik | 0.81077 | 0.08 | D130040H23Rik | 0.10970 | 0.63 | Dnase2a | 0.72649 | 0.11 | Cd248 | 0.95267 | 0.03 |
| 439 | Mapk8ip1 | 0.51933 | -0.12 | Krt73 | 0.50010 | 0.24 | Adra2a | 0.79062 | -0.08 | Stab1 | 0.83374 | -0.09 | Slc25a24 | 0.93288 | -0.04 |
| 440 | Sspn | 0.86601 | -0.06 | Dnm1 | 0.40224 | -0.18 | Slc9a3r1 | 0.00455 | -0.36 | Mybpc3 | N/A | N/A | Egflam | 0.97135 | 0.03 |
| 441 | Dock5 | 0.00360 | -1.29 | Dgkg | 0.47024 | -0.21 | Klf4 | 0.29786 | -0.46 | Plekho1 | 0.89666 | -0.05 | Tgfbr3 | 0.18992 | 0.28 |
| 442 | Glra4 | N/A | N/A | AI593442 | 0.71036 | 0.06 | Fgfr2 | 0.00629 | -0.22 | Il1r2 | N/A | N/A | 9430020K01Rik | 0.65404 | -0.08 |
| 443 | Arhgap24 | 0.04725 | -0.81 | Stmn3 | 0.25432 | -0.20 | Gm12238 | N/A | N/A | Slc25a45 | 0.69337 | -0.22 | Serpina3f | 0.42914 | -0.56 |
| 444 | Rlbp1 | 0.27027 | -0.52 | Agbl4 | 0.33299 | 0.41 | Etv4 | 0.98174 | 0.01 | Arhgap22 | 0.48332 | 0.67 | Esm1 | 0.73888 | 0.32 |
| 445 | Sox3 | N/A | N/A | Gda | 0.71087 | -0.08 | Fam59b | 0.40009 | -0.48 | Qprt | N/A | N/A | Tacr3 | 0.56835 | 0.32 |
| 446 | Zdhhc9 | 0.14859 | -0.42 | Prkar1b | 0.02956 | -0.24 | Rasl11b | 0.41771 | -0.25 | Clcf1 | N/A | N/A | H2-T10 | 0.75596 | 0.09 |
| 447 | Tmbim1 | 0.05233 | -0.20 | Cbln1 | 0.91234 | 0.06 | Abcb9 | 0.75860 | 0.09 | Gm13889 | 0.65498 | -0.33 | Anxa3 | 0.38828 | 0.64 |
| 448 | AV320801 | N/A | N/A | Tchh | 0.80013 | 0.13 | Cideb | 0.33225 | -0.61 | Sirpa | 0.21635 | -0.15 | Crybg3 | 0.55802 | 0.13 |
| 449 | Sox2ot | 0.00666 | -0.71 | Rassf6 | 0.79320 | -0.91 | Dmd | 0.12277 | 0.22 | Nod2 | 0.11800 | 1.01 | Rhobtb1 | 0.65867 | -0.36 |
| 450 | Efhd1 | 0.02822 | -1.10 | Frmpd3 | 0.17174 | 0.42 | Pou3f4 | 0.78491 | 0.34 | Nlrp1a | 0.96839 | 0.02 | Gng11 | 0.55261 | -0.31 |
| 451 | Gp1bb | 0.36512 | -0.87 | Klhdc8a | 0.35436 | -0.50 | 2810459M11Rik | 0.49657 | 0.24 | Limd2 | 0.10967 | -0.66 | Sepp1 | 0.51481 | -0.09 |
| 452 | Mtap1a | 0.20790 | -0.16 | Bsn | 0.51326 | -0.13 | Tex9 | 0.62891 | 0.09 | Cd300lb | N/A | N/A | Myof | 0.51103 | 0.22 |
| 453 | Fbxo36 | 0.07431 | 1.01 | Jph4 | 0.25236 | -0.16 | Glud1 | 0.54653 | -0.06 | Apobr | 0.69667 | 0.29 | Ccdc141 | 0.09942 | 0.31 |
| 454 | Igsf9b | 0.76280 | 0.11 | AI836003 | 0.00892 | -0.86 | Gm10565 | 0.49351 | -1.18 | Dok2 | N/A | N/A | Il17rc | 0.44495 | 1.54 |
| 455 | Itgb7 | 0.95737 | -0.06 | Cd24a | 0.02402 | 0.39 | Mgst1 | 0.57498 | 0.24 | Uba7 | 0.11893 | -1.49 | Clec9a | 0.56112 | 0.48 |
| 456 | Apbb1 | 0.32418 | -0.22 | Epb4.9 | 0.11085 | -0.35 | Macf1 | 0.82922 | -0.03 | Hpgds | 0.72636 | 0.06 | Maoa | 0.71095 | 0.18 |
| 457 | S100a4 | 0.69158 | 0.07 | Lrfn5 | 0.27037 | 0.11 | Nr4a3 | 0.74720 | 0.11 | C1rl | 0.98243 | 0.02 | Jag2 | 0.29015 | 0.36 |
| 458 | Slc22a23 | 0.02963 | -0.38 | Stxbp1 | 0.05156 | -0.13 | 5930412G12Rik | 0.43444 | -0.06 | Tlr6 | 0.95509 | 0.64 | Msx1 | N/A | N/A |
| 459 | Myo1d | 0.07018 | -0.74 | Kcnq2 | 0.67045 | -0.06 | Sncaip | 0.96886 | 0.01 | Arl4c | 0.81778 | -0.06 | Prom1 | 0.45501 | -0.17 |
| 460 | Sox6 | 0.28748 | -0.22 | Pcdha2 | 0.39983 | -0.54 | AU021034 | 0.19394 | 1.19 | Tspan33 | 0.68876 | -0.11 | Mapk12 | 0.82708 | 0.16 |
| 461 | Sema3e | 0.43914 | 0.15 | Camk2b | 0.27185 | -0.24 | Tmem200c | 0.70081 | -0.12 | Dusp27 | 0.61301 | 0.67 | Ppef1 | 0.86361 | -0.12 |
| 462 | Ssh3 | 0.28289 | -0.50 | Nov | 0.92306 | 0.02 | Ak7 | 0.30302 | 1.08 | Cybb | 0.61258 | 0.39 | Kti12 | 0.83060 | -0.07 |
| 463 | Sema4d | 0.02668 | -0.24 | Nts | 0.51964 | -0.36 | Nrarp | 0.88296 | 0.06 | Serpinf1 | 0.10153 | -0.53 | Serpina3i | N/A | N/A |
| 464 | Otud7b | 0.01032 | -0.38 | Cntn3 | 0.65174 | 0.09 | Fam84a | 0.92487 | 0.02 | Guca1a | N/A | N/A | Cd55 | 0.00919 | 0.48 |
| 465 | Pcbp4 | 0.88777 | -0.03 | Klhl29 | 0.57375 | 0.13 | Ccdc3 | 0.58040 | 0.08 | B4galt1 | 0.77960 | -0.06 | Lrrc32 | 0.85396 | 0.10 |
| 466 | Efs | 0.72200 | -0.27 | Adra2c | 0.58704 | -0.19 | Vav3 | 0.54288 | 0.21 | Rilpl2 | 0.66602 | 0.22 | H2-D1 | 0.83990 | -0.06 |
| 467 | Spon1 | 0.09953 | -0.17 | Gm5424 | 0.68204 | 0.26 | Nek8 | 0.49838 | 0.46 | Il17ra | 0.31041 | -0.20 | Gcom1 | N/A | N/A |
| 468 | Lrrtm4 | 0.06560 | 0.23 | Pnma2 | 0.06671 | 0.35 | 42622 | N/A | N/A | Slc17a9 | N/A | N/A | 2900073G15Rik | N/A | N/A |
| 469 | Adora1 | 0.86656 | -0.04 | Syt17 | 0.66570 | -0.11 | Cnn1 | N/A | N/A | Hp | N/A | N/A | Def6 | 0.87003 | 0.44 |
| 470 | Elfn2 | 0.31280 | -0.11 | Sncb | 0.79587 | -0.03 | Nmb | 0.01456 | -1.23 | Gmip | 0.53447 | -0.21 | Pcp4l1 | 0.72058 | 0.10 |
| 471 | A330049M08Rik | 0.66202 | 0.52 | Pgm2l1 | 0.10294 | 0.20 | Gpt | 0.72891 | -0.32 | Glrp1 | 0.30584 | 1.50 | Slco1a6 | N/A | N/A |
| 472 | Dnajb2 | 0.40767 | -0.28 | Tmem169 | 0.33624 | 0.31 | Fgd6 | 0.17033 | -0.18 | C2 | 0.43723 | 1.11 | Naalad2 | 0.93407 | -0.04 |
| 473 | Lox | 0.61202 | 0.49 | Fstl4 | 0.06116 | -0.41 | Cecr2 | 0.89304 | 0.02 | Hpn | N/A | N/A | Usp18 | 0.80877 | -0.20 |
| 474 | Nmral1 | 0.41284 | -0.30 | Sema6c | 0.67654 | 0.22 | Cspp1 | 0.10244 | 0.18 | Pnpla7 | 0.59217 | -0.16 | Pdia5 | 0.70995 | -0.23 |
| 475 | Lrrtm1 | 0.21037 | -0.46 | Radil | 0.68573 | -0.25 | Fads2 | 0.67987 | -0.07 | Zfhx3 | 0.82905 | -0.06 | Trim12c | 0.92227 | 0.03 |
| 476 | Dusp19 | 0.36405 | -0.35 | Pde1a | 0.11135 | 0.31 | Nckap5 | 0.67361 | -0.10 | Cd4 | 0.72012 | 0.33 | Lnx2 | 0.09995 | -0.77 |
| 477 | Nrtn | N/A | N/A | Mical2 | 0.51901 | -0.11 | Sh3pxd2b | 0.41876 | -0.17 | Lbx2 | N/A | N/A | Gata3 | N/A | N/A |
| 478 | Cyp2j6 | 0.51826 | -0.10 | Ufsp1 | 0.75103 | 0.18 | Slc6a1 | 0.52371 | 0.07 | Tnfsf14 | N/A | N/A | Abcb1b | 0.66723 | 0.09 |
| 479 | Srcin1 | 0.86190 | -0.03 | Tcerg1l | 0.64245 | -0.14 | Fam69c | 0.69428 | 0.17 | H2-K2 | N/A | N/A | Pls3 | 0.04527 | 0.18 |
| 480 | E330009J07Rik | 0.25867 | -0.59 | Sstr2 | 0.11428 | 0.36 | C130071C03Rik | 0.03218 | 0.41 | Lcp2 | 0.24901 | -0.29 | 4930425O10Rik | 0.51382 | 0.83 |
| 481 | Slitrk6 | 0.24874 | 0.47 | Upp2 | 0.06331 | 0.98 | Stk38l | 0.43436 | 0.11 | Icam1 | 0.70061 | 0.13 | Htr2a | 0.37887 | 0.09 |
| 482 | Odf3l2 | N/A | N/A | Tmem63c | 0.49140 | -0.08 | Gabbr2 | 0.16015 | -0.29 | Cyba | 0.32544 | 0.45 | Atp13a5 | 0.75024 | -0.14 |
| 483 | Kctd4 | 0.38413 | -0.22 | Celf3 | 0.11850 | 0.23 | Pcdhgc5 | 0.42943 | -0.12 | H2-Q7 | 0.50448 | -0.48 | Nodal | N/A | N/A |
| 484 | Col9a2 | 0.22522 | -0.65 | Lonrf2 | 0.66074 | 0.04 | A930017M01Rik | 0.88373 | 0.05 | Cd22 | 0.26346 | 0.26 | Gm5127 | 0.57326 | -0.81 |
| 485 | Galnt6 | 0.03866 | -1.30 | Has3 | 0.60849 | -0.16 | Fgf2 | 0.97297 | 0.01 | Cd72 | 0.31680 | -0.90 | Ahnak | 0.59735 | 0.13 |
| 486 | Serinc2 | 0.61700 | 0.18 | Syt3 | 0.78181 | 0.04 | Itga6 | 0.00246 | 0.43 | Msr1 | 0.82092 | 0.12 | Ecscr | 0.76203 | -0.33 |
| 487 | Col13a1 | N/A | N/A | Fam163b | 0.18410 | -0.49 | Adamts5 | 0.66120 | 0.23 | Mobkl2c | N/A | N/A | Sntb2 | 0.09171 | 0.25 |
| 488 | Tspo2 | N/A | N/A | Zfp385b | 0.90166 | -0.03 | LOC329427 | 0.78443 | -0.09 | Ticam1 | 0.81936 | 0.06 | Fam55b | 0.14030 | 0.49 |
| 489 | Olfm2 | 0.77223 | -0.09 | Rab6b | 0.43052 | -0.06 | Sox2 | 0.62780 | 0.16 | Cables1 | 0.22116 | -0.54 | Rtp3 | 0.88452 | 0.07 |
| 490 | Slc1a1 | 0.53566 | 0.11 | Cadps | 0.96755 | 0.01 | Kcnc4 | 0.05115 | -0.32 | Txnip | 0.72267 | -0.19 | Snai2 | 0.27687 | 0.44 |
| 491 | Rprm | 0.44547 | -0.40 | Sdk2 | 0.60945 | 0.15 | Rassf10 | 0.60939 | -0.26 | Evi2b | 0.51715 | 0.34 | Nmi | 0.80526 | -0.13 |
| 492 | Rasal1 | 0.01987 | -0.48 | Rai2 | 0.39020 | -0.25 | Gm889 | 0.38624 | 0.65 | Osgin1 | N/A | N/A | Fam13a | 0.11601 | -0.13 |
| 493 | Evi5l | 0.06303 | -0.34 | Scrt1 | 0.32691 | -0.35 | Zfp280c | 0.58159 | 0.09 | Hspa1a | 0.32099 | -0.38 | Slc35d2 | 0.00782 | 0.77 |
| 494 | Cacna2d4 | 0.96297 | -0.03 | Adcy1 | 0.32673 | -0.24 | Leng8 | 0.79956 | -0.07 | Sqrdl | 0.62837 | -0.34 | Rassf3 | 0.74912 | -0.10 |
| 495 | Ntn1 | 0.98738 | 0.01 | Shank1 | 0.64711 | -0.05 | AA387883 | 0.30005 | -0.39 | Slco2b1 | 0.91010 | 0.01 | 1700018A04Rik | N/A | N/A |
| 496 | Dmrtc1a | 0.35116 | -0.40 | Vsnl1 | 0.35077 | -0.20 | Pld2 | 0.57690 | 0.21 | Ripk3 | 0.42348 | 2.08 | Adamts9 | 0.86104 | -0.06 |
| 497 | Bpgm | 0.42754 | -0.33 | Unc13a | 0.95046 | 0.01 | Dnali1 | 0.33348 | 1.10 | Clec5a | 0.89053 | 0.47 | Dennd2c | 0.32624 | 0.51 |
| 498 | Cyfip2 | 0.29088 | -0.15 | Tmem145 | 0.50783 | 0.09 | Arhgef33 | 0.62142 | 1.11 | Cd80 | 0.01424 | -1.26 | Aoc3 | 0.38512 | 0.39 |
| 499 | Lrrn3 | 0.16494 | 0.19 | Eya2 | 0.37923 | -0.66 | Ptn | 0.58529 | -0.15 | F630110N24Rik | 0.35366 | -1.20 | 4930523C07Rik | 0.25832 | 0.73 |
| 500 | Rnf122 | 0.09935 | -0.57 | Dusp14 | 0.02375 | -0.62 | 1700019G17Rik | 0.09892 | 0.63 | Nab2 | 0.22580 | -0.31 | 2310016C08Rik | N/A | N/A |

F.C.; fold change.
